# Supplementary material for: Trends in cancer incidence and mortality rates in the United States from 1975 to 2016
Source: PubMed Central journal article supplement — Ann Transl Med. 2020 Dec;8(24):1671. doi: 10.21037/atm-20-7841 (PMC7812176; doi:10.21037/atm-20-7841), 2020-12
Supplement: atm-08-24-1671-supplementary.pdf [file atm-08-24-1671-supplementary.pdf]

**Table S1** Incidence rate changes from 1975–2016 of the 10 leading cancers in males by race and ethnicity in the United States

| Cancer                               | Incidence rank |      |      | Age-adjusted incidence rate (95% CI) |                     |                     | Incidence count |        |        | Relative change in incidence (2016 vs. 1975) | Relative change in incidence (2016 vs. 2000) |
|--------------------------------------|----------------|------|------|--------------------------------------|---------------------|---------------------|-----------------|--------|--------|----------------------------------------------|----------------------------------------------|
|                                      | 1975           | 2000 | 2016 | 1975                                 | 2000                | 2016                | 1975            | 2000   | 2016   |                                              |                                              |
| <b>Male white</b>                    |                |      |      |                                      |                     |                     |                 |        |        |                                              |                                              |
| All malignant cancers                |                |      |      | 468.6 (462.9–474.3)                  | 585.1 (580.1–590.1) | 474.1(470.2–478.0)  | 29,271          | 53,200 | 59,791 | 1.2%                                         | –19.0%                                       |
| Prostate                             | 1              | 1    | 1    | 92.2 (89.5–94.9)                     | 179.8 (177.1–182.6) | 102.0 (100.3–103.8) | 5,042           | 16,233 | 13,877 | 10.6%                                        | –43.3%                                       |
| Lung and bronchus                    | 2              | 2    | 2    | 89.1 (86.8–91.6)                     | 80.8 (78.9–82.7)    | 56.1 (54.8–57.5)    | 5,909           | 7,223  | 6,975  | –37.0%                                       | –30.6%                                       |
| Colon and rectum                     | 3              | 3    | 3    | 69.8 (67.6–72.0)                     | 63.1 (61.5–64.8)    | 41.1 (39.9–42.2)    | 4,180           | 5,615  | 5,080  | –41.1%                                       | –34.9%                                       |
| Melanoma of the skin                 | 10             | 6    | 4    | 9.4 (8.7–10.2)                       | 28.5 (27.5–29.7)    | 38.9 (37.7–40.0)    | 664             | 2,708  | 4,789  | 313.8%                                       | 36.5%                                        |
| Urinary bladder                      | 4              | 4    | 5    | 36.4 (34.8–38.1)                     | 42.6 (41.2–44.0)    | 37.2 (36.0–38.3)    | 2,184           | 3,746  | 4,489  | 2.2%                                         | –12.7%                                       |
| Lymphoma                             | 6              | 5    | 6    | 17.4 (16.4–18.5)                     | 29.3 (28.2–30.4)    | 27.4 (26.5–28.4)    | 1,234           | 2,745  | 3,310  | 57.5%                                        | –6.5%                                        |
| Kidney and renal pelvis              | 9              | 8    | 7    | 10.8 (10.0–11.7)                     | 18.1 (17.3–19.0)    | 21.6 (20.7–22.4)    | 725             | 1,689  | 2,732  | 100.0%                                       | 19.3%                                        |
| Leukaemia                            | 5              | 7    | 8    | 17.5 (16.4–18.6)                     | 18.9 (18.0–19.8)    | 19.2 (18.4–20.0)    | 1,103           | 1,712  | 2,315  | 9.7%                                         | 1.6%                                         |
| Pancreas                             | 8              | 9    | 9    | 15.7 (14.6–16.7)                     | 12.9 (12.2–13.7)    | 14.1 (13.4–14.8)    | 958             | 1,157  | 1,762  | –10.2%                                       | 9.3%                                         |
| Liver                                | 18             | 16   | 10   | 3.0 (2.6–3.5)                        | 5.9 (5.4–6.4)       | 9.7 (9.1–10.2)      | 193             | 547    | 1,318  | 223.3%                                       | 64.4%                                        |
| <b>Male black</b>                    |                |      |      |                                      |                     |                     |                 |        |        |                                              |                                              |
| All malignant cancers                |                |      |      | 525.4 (502.5–549.0)                  | 718.6 (699.9–737.7) | 521.7 (509.6–534.0) | 2,605           | 6,285  | 8,186  | –0.7%                                        | –27.4%                                       |
| Prostate                             | 1              | 1    | 1    | 141.2 (128.3–154.8)                  | 296.6 (284.6–309.0) | 172.8 (166.1–179.7) | 577             | 2,486  | 2,853  | 22.4%                                        | –41.7%                                       |
| Lung and bronchus                    | 2              | 2    | 2    | 114.7 (105.0–125.0)                  | 115.1 (107.6–122.9) | 73.0 (68.3–77.9)    | 629             | 982    | 1,047  | –36.4%                                       | –36.6%                                       |
| Colon and rectum                     | 3              | 3    | 3    | 59.3 (51.5–67.9)                     | 74.4 (68.2–80.9)    | 51.0 (47.3–55.0)    | 272             | 612    | 783    | –14.0%                                       | –31.5%                                       |
| Kidney and renal pelvis              | 12             | 7    | 4    | 8.2 (5.9–11.2)                       | 19.2 (16.3–22.5)    | 25.6 (23.1–28.3)    | 49              | 176    | 423    | 212.2%                                       | 33.3%                                        |
| Lymphoma                             | 10             | 4    | 5    | 11.7 (9.1–14.9)                      | 21.3 (18.4–24.4)    | 22.3 (20.0–24.9)    | 80              | 234    | 372    | 90.6%                                        | 4.7%                                         |
| Urinary bladder                      | 7              | 5    | 6    | 16.3 (12.5–20.9)                     | 20.3 (17.1–24.0)    | 20.9 (18.2–23.7)    | 78              | 155    | 263    | 28.2%                                        | 3.0%                                         |
| Liver                                | 13             | 13   | 7    | 5.9 (4.0–8.3)                        | 10.4 (8.3–12.7)     | 17.1 (15.2–19.2)    | 36              | 103    | 316    | 189.8%                                       | 64.4%                                        |
| Pancreas                             | 6              | 8    | 8    | 18.1 (14.2–22.6)                     | 18.2 (15.4–21.3)    | 17.0 (14.8–19.4)    | 96              | 167    | 253    | –6.1%                                        | –6.6%                                        |
| Myeloma                              | 11             | 11   | 9    | 10.9 (8.0–14.4)                      | 10.9 (8.8–13.4)     | 16.5 (14.4–18.8)    | 56              | 99     | 252    | 51.4%                                        | 51.4%                                        |
| Leukaemia                            | 7              | 9    | 10   | 16.3 (12.1–21.3)                     | 14.1 (11.6–16.8)    | 15.3 (13.2–17.6)    | 75              | 137    | 227    | –6.1%                                        | 8.5%                                         |
| <b>Male other race and ethnicity</b> |                |      |      |                                      |                     |                     |                 |        |        |                                              |                                              |
| All malignant cancers                |                |      |      | 330.2 (309.4–352.0)                  | 413.8 (401.2–426.6) | 323.2 (315.1–331.4) | 1,115           | 4,288  | 6,395  | –2.1%                                        | –21.9%                                       |
| Prostate                             | 1              | 1    | 1    | 61.9 (52.3–72.6)                     | 114.2 (107.6–121.2) | 64.3 (60.8–68.0)    | 170             | 1,125  | 1,282  | 3.9%                                         | –43.7%                                       |
| Lung and bronchus                    | 2              | 2    | 2    | 58.5 (50.0–68.0)                     | 64.5 (59.6–69.7)    | 48.3 (45.1–51.6)    | 198             | 649    | 903    | –17.4%                                       | –25.1%                                       |
| Colon and rectum                     | 3              | 3    | 3    | 49.4 (41.8–57.8)                     | 58.3 (53.6–63.2)    | 40.8 (38.0–43.8)    | 176             | 602    | 820    | –17.4%                                       | –30.0%                                       |
| Lymphoma                             | 6              | 6    | 4    | 12.4 (8.9–16.7)                      | 17.2 (14.8–19.8)    | 18.1 (16.3–20.1)    | 48              | 198    | 372    | 46.0%                                        | 5.2%                                         |
| Liver                                | 8              | 7    | 5    | 11.8 (8.5–15.9)                      | 16.4 (14.1–18.9)    | 17.0 (15.3–19.0)    | 46              | 187    | 355    | 44.1%                                        | 3.7%                                         |
| Urinary bladder                      | 5              | 5    | 6    | 18.3 (13.3–24.3)                     | 18.3 (15.7–21.3)    | 16.0 (14.2–18.0)    | 52              | 179    | 296    | –12.6%                                       | –12.6%                                       |
| Kidney and renal pelvis              | 13             | 10   | 7    | 4.1 (2.2–6.8)                        | 10.9 (9.0–13.0)     | 13.7 (12.1–15.5)    | 16              | 118    | 279    | 234.1%                                       | 25.7%                                        |
| Pancreas                             | 9              | 8    | 8    | 9.9 (6.5–14.3)                       | 12.1 (10.0–14.5)    | 13.1 (11.5–14.9)    | 30              | 120    | 246    | 32.3%                                        | 8.3%                                         |
| Stomach                              | 4              | 4    | 9    | 28.1 (22.2–34.8)                     | 21.5 (18.6–24.6)    | 11.3 (9.8–12.9)     | 95              | 212    | 214    | –59.8%                                       | –47.4%                                       |
| Leukaemia                            | 10             | 9    | 10   | 8.3 (5.3–12.3)                       | 11.9 (10.0–14.2)    | 10.1 (8.8–11.7)     | 31              | 138    | 201    | 21.7%                                        | –15.1%                                       |

Rank is based on age-adjusted incidence rate. Age-adjusted incidence rates are per 100,000 population and age-adjusted to the 2000 United States standard population. Incidence count is the number of cancer occurrences. Other race and ethnicity includes American Indian/AK Native, Asian/Pacific Islander. CI, confidence interval.

**Table S2 Incidence rate changes from 1975–2016 of the 10 leading cancers in females by race and ethnicity in the United States**

| Cancer                                 | Incidence rank |      |      | Age-adjusted incidence rate (95% CI) |                     |                     | Incidence count |        |        | Relative change in incidence (2016 vs. 1975) | Relative change in incidence (2016 vs. 2000) |
|----------------------------------------|----------------|------|------|--------------------------------------|---------------------|---------------------|-----------------|--------|--------|----------------------------------------------|----------------------------------------------|
|                                        | 1975           | 2000 | 2016 | 1975                                 | 2000                | 2016                | 1975            | 2000   | 2016   |                                              |                                              |
| <b>Female white</b>                    |                |      |      |                                      |                     |                     |                 |        |        |                                              |                                              |
| All malignant cancers                  |                |      |      | 369.7 (365.5–373.9)                  | 438.2 (434.3–442.1) | 424.7 (421.2–428.3) | 30,823          | 49,974 | 58,632 | 14.9%                                        | –3.1%                                        |
| Breast                                 | 1              | 1    | 1    | 107.4 (105.1–109.7)                  | 143.0 (140.8–145.3) | 132.7 (130.7–134.7) | 8,741           | 16,015 | 18,106 | 23.6%                                        | –7.2%                                        |
| Lung and bronchus                      | 4              | 2    | 2    | 24.8 (23.8–25.9)                     | 53.2 (51.9–54.6)    | 47.1 (46.0–48.3)    | 2,121           | 6,110  | 6,925  | 89.9%                                        | –11.5%                                       |
| Colon and rectum                       | 2              | 3    | 3    | 54.1 (52.5–55.7)                     | 46.6 (45.3–47.8)    | 32.6 (31.6–33.6)    | 4,504           | 5,608  | 4,560  | –39.7%                                       | –30.0%                                       |
| Corpus and uterus                      | 3              | 4    | 4    | 37.3 (36.1–38.7)                     | 26.2 (25.3–27.2)    | 28.0 (27.1–28.9)    | 3,259           | 2,940  | 4,065  | –24.9%                                       | 6.9%                                         |
| Melanoma of the skin                   | 11             | 6    | 5    | 8.3 (7.6–8.9)                        | 19.1 (18.3–20.0)    | 26.2 (25.3–27.1)    | 674             | 2,092  | 3,390  | 215.7%                                       | 37.2%                                        |
| Thyroid                                | 13             | 8    | 6    | 6.4 (5.8–7.0)                        | 11.8 (11.1–12.5)    | 22.7 (21.8–23.6)    | 526             | 1,251  | 2,627  | 254.7%                                       | 92.4%                                        |
| Lymphoma                               | 7              | 5    | 7    | 12.7 (12.0–13.5)                     | 19.7 (18.9–20.6)    | 19.1 (18.4–19.9)    | 1,093           | 2,258  | 2,643  | 50.4%                                        | –3.0%                                        |
| Pancreas                               | 10             | 11   | 8    | 8.9 (8.3–9.6)                        | 9.6 (9.0–10.1)      | 11.4 (10.9–12.0)    | 744             | 1,147  | 1,698  | 28.1%                                        | 18.8%                                        |
| Leukaemia                              | 8              | 9    | 9    | 10.1 (9.4–10.8)                      | 11.2 (10.6–11.9)    | 11.1 (10.5–11.7)    | 846             | 1,301  | 1,506  | 9.9%                                         | –0.9%                                        |
| Kidney and renal pelvis                | 15             | 12   | 10   | 4.6 (4.2–5.1)                        | 8.4 (7.9–9.0)       | 10.6 (10.0–11.1)    | 392             | 960    | 1,462  | 130.4%                                       | 26.2%                                        |
| <b>Female black</b>                    |                |      |      |                                      |                     |                     |                 |        |        |                                              |                                              |
| All malignant cancers                  |                |      |      | 356.9 (341.7–372.6)                  | 407.5 (396.3–418.9) | 402.5 (393.6–411.6) | 2,325           | 5,205  | 8,180  | 12.8%                                        | –1.2%                                        |
| Breast                                 | 1              | 1    | 1    | 93.6 (86.2–101.4)                    | 119.3 (113.4–125.4) | 128.2 (123.2–133.3) | 637             | 1,596  | 2,642  | 37.0%                                        | 7.5%                                         |
| Lung and bronchus                      | 4              | 3    | 2    | 24.7 (20.8–29.0)                     | 57.8 (53.6–62.3)    | 46.4 (43.3–49.6)    | 160             | 701    | 908    | 87.9%                                        | –19.7%                                       |
| Colon and rectum                       | 2              | 2    | 3    | 54.7 (48.4–61.4)                     | 58.1 (53.9–62.7)    | 41.6 (38.8–44.7)    | 314             | 692    | 831    | –23.9%                                       | –28.4%                                       |
| Corpus and uterus                      | 5              | 4    | 4    | 20.1 (16.6–24.0)                     | 18.1 (15.8–20.7)    | 27.8 (25.5–30.2)    | 128             | 225    | 595    | 38.3%                                        | 53.6%                                        |
| Lymphoma                               | 11             | 6    | 5    | 6.4 (4.5–8.8)                        | 12.6 (10.8–14.7)    | 16.4 (14.6–18.3)    | 45              | 179    | 329    | 156.3%                                       | 30.2%                                        |
| Pancreas                               | 6              | 5    | 6    | 13.9 (10.9–17.4)                     | 13.4 (11.3–15.7)    | 14.7 (13.0–16.6)    | 84              | 156    | 294    | 5.8%                                         | 9.7%                                         |
| Kidney and renal pelvis                | 13             | 7    | 7    | 4.3 (2.8–6.4)                        | 12.0 (10.1–14.1)    | 13.9 (12.3–15.7)    | 28              | 154    | 278    | 223.3%                                       | 15.8%                                        |
| Thyroid                                | 14             | 14   | 8    | 4.2 (2.9–6.0)                        | 6.6 (5.3–8.1)       | 12.9 (11.4–14.6)    | 35              | 98     | 273    | 207.1%                                       | 95.5%                                        |
| Myeloma                                | 9              | 8    | 9    | 8.6 (6.3–11.4)                       | 11.1 (9.2–13.1)     | 12.5 (10.9–14.2)    | 51              | 133    | 242    | 45.3%                                        | 12.6%                                        |
| Leukaemia                              | 10             | 10   | 10   | 8.5 (6.3–11.2)                       | 10.3 (8.6–12.3)     | 9.5 (8.2–11.0)      | 58              | 134    | 189    | 11.8%                                        | –7.8%                                        |
| <b>Female other race and ethnicity</b> |                |      |      |                                      |                     |                     |                 |        |        |                                              |                                              |
| All malignant cancers                  |                |      |      | 271.3 (254.4–289.0)                  | 299.3 (290.1–308.7) | 308.8 (301.9–315.9) | 1,063           | 4,073  | 7,733  | 13.8%                                        | 3.2%                                         |
| Breast                                 | 1              | 1    | 1    | 59.8 (52.4–67.9)                     | 93.5 (88.5–98.7)    | 105.1 (101.1–109.2) | 251             | 1,308  | 2,635  | 75.8%                                        | 12.4%                                        |
| Lung and bronchus                      | 5              | 3    | 2    | 17.3 (13.2–22.3)                     | 27.1 (24.3–30.0)    | 29.9 (27.7–32.1)    | 64              | 353    | 745    | 72.8%                                        | 10.3%                                        |
| Colon and rectum                       | 2              | 2    | 3    | 40.3 (33.5–47.9)                     | 35.8 (32.6–39.2)    | 27.3 (25.2–29.4)    | 139             | 468    | 687    | –32.3%                                       | –23.7%                                       |
| Corpus and uterus                      | 4              | 4    | 4    | 21.2 (17.1–26.0)                     | 18.2 (16.0–20.6)    | 24.7 (22.8–26.8)    | 95              | 254    | 639    | 16.5%                                        | 35.7%                                        |
| Thyroid                                | 8              | 7    | 5    | 11.7 (8.7–15.4)                      | 11.2 (9.6–13.1)     | 19.8 (18.0–21.6)    | 54              | 168    | 486    | 69.2%                                        | 76.8%                                        |
| Lymphoma                               | 13             | 5    | 6    | 4.7 (2.8–7.4)                        | 12.7 (10.9–14.8)    | 12.4 (11.0–13.9)    | 21              | 172    | 305    | 163.8%                                       | –2.4%                                        |
| Pancreas                               | 10             | 9    | 7    | 6.1 (3.7–9.5)                        | 9.4 (7.8–11.3)      | 9.9 (8.7–11.3)      | 21              | 118    | 250    | 62.3%                                        | 5.3%                                         |
| Ovary                                  | 7              | 8    | 8    | 13.1 (9.7–17.2)                      | 10.2 (8.6–12.0)     | 8.1 (7.0–9.4)       | 55              | 143    | 198    | –38.2%                                       | –20.6%                                       |
| Stomach                                | 3              | 6    | 9    | 21.7 (16.8–27.5)                     | 11.8 (10.0–13.8)    | 7.3 (6.3–8.5)       | 72              | 149    | 184    | –66.4%                                       | –38.1%                                       |
| Leukaemia                              | 9              | 11   | 10   | 8.8 (5.9–12.6)                       | 6.6 (5.3–8.1)       | 6.4 (5.4–7.5)       | 34              | 91     | 154    | –27.3%                                       | –3.0%                                        |

Rank is based on age-adjusted incidence rate. Age-adjusted incidence rates are per 100,000 population and age-adjusted to the 2000 United States standard population. Incidence count is the number of cancer occurrences. Other race and ethnicity includes American Indian/AK Native, Asian/Pacific Islander. CI, confidence interval.

**Table S3** Incidence rate changes from 1975–2016 of the 10 leading cancers by age group (birth – 39 years) in the United States

| Cancer                          | Incidence rank |      |      | Age-adjusted incidence rate (95% CI) |                  |                  | Incidence count |       |       | Relative change in incidence (2016 vs. 1975) | Relative change in incidence (2016 vs. 2000) |
|---------------------------------|----------------|------|------|--------------------------------------|------------------|------------------|-----------------|-------|-------|----------------------------------------------|----------------------------------------------|
|                                 | 1975           | 2000 | 2016 | 1975                                 | 2000             | 2016             | 1975            | 2000  | 2016  |                                              |                                              |
| <b>Male (birth –39 years)</b>   |                |      |      |                                      |                  |                  |                 |       |       |                                              |                                              |
| All malignant cancers           |                |      |      | 32.7 (31.2–34.3)                     | 41.2 (39.8–42.6) | 44.0 (42.6–45.5) | 1,937           | 3,290 | 3,662 | 34.6%                                        | 6.8%                                         |
| Testis                          | 2              | 2    | 1    | 4.0 (3.5–4.5)                        | 6.5 (6.0–7.1)    | 7.3 (6.7–7.9)    | 252             | 528   | 633   | 82.5%                                        | 12.3%                                        |
| Lymphoma                        | 1              | 1    | 2    | 5.5 (4.9–6.1)                        | 7.0 (6.4–7.6)    | 6.5 (5.9–7.0)    | 352             | 560   | 546   | 18.2%                                        | –7.1%                                        |
| Leukaemia                       | 3              | 4    | 3    | 3.6 (3.1–4.1)                        | 4.0 (3.6–4.5)    | 4.6 (4.1–5.1)    | 225             | 320   | 372   | 27.8%                                        | 15.0%                                        |
| Melanoma of the skin            | 4              | 3    | 4    | 3.0 (2.5–3.5)                        | 4.4 (3.9–4.9)    | 4.0 (3.5–4.4)    | 167             | 351   | 328   | 33.3%                                        | –9.1%                                        |
| Brain and other nervous system  | 5              | 5    | 5    | 2.7 (2.3–3.1)                        | 3.6 (3.2–4.0)    | 3.4 (3.0–3.8)    | 169             | 283   | 284   | 25.9%                                        | –5.6%                                        |
| Colon and rectum                | 7              | 6    | 6    | 1.6 (1.3–2.0)                        | 2.0 (1.7–2.3)    | 3.2 (2.8–3.6)    | 85              | 156   | 264   | 100.0%                                       | 60.0%                                        |
| Thyroid                         | 7              | 7    | 7    | 1.6 (1.2–1.9)                        | 1.7 (1.4–2.0)    | 2.9 (2.6–3.3)    | 92              | 133   | 243   | 81.3%                                        | 70.6%                                        |
| Kidney and renal pelvis         | 10             | 9    | 8    | 1.0 (0.7–1.3)                        | 1.1 (0.9–1.4)    | 1.9 (1.6–2.3)    | 50              | 89    | 153   | 90.0%                                        | 72.7%                                        |
| Soft tissue including heart     | 9              | 8    | 9    | 1.1 (0.8–1.4)                        | 1.5 (1.3–1.8)    | 1.8 (1.5–2.1)    | 70              | 122   | 151   | 63.6%                                        | 20.0%                                        |
| Bones and joints                | 12             | 10   | 10   | 0.8 (0.6–1.1)                        | 0.8 (0.6–1.0)    | 0.8 (0.6–1.0)    | 58              | 64    | 64    | 0.0%                                         | 0.0%                                         |
| <b>Female (birth –39 years)</b> |                |      |      |                                      |                  |                  |                 |       |       |                                              |                                              |
| All malignant cancers           |                |      |      | 48.2 (46.3–50.1)                     | 55.3 (53.7–57.0) | 66.5 (64.8–68.4) | 2,703           | 4,343 | 5,366 | 38.0%                                        | 20.3%                                        |
| Breast                          | 1              | 1    | 1    | 12.3 (11.3–13.3)                     | 13.1 (12.3–14.0) | 14.1 (13.3–14.9) | 593             | 1,035 | 1,109 | 14.6%                                        | 7.6%                                         |
| Thyroid                         | 3              | 2    | 2    | 4.6 (4.0–5.2)                        | 7.2 (6.7–7.9)    | 13.3 (12.5–14.1) | 281             | 574   | 1,100 | 189.1%                                       | 84.7%                                        |
| Melanoma of the skin            | 5              | 3    | 3    | 3.6 (3.1–4.2)                        | 6.4 (5.9–7.0)    | 7.0 (6.4–7.5)    | 214             | 509   | 571   | 94.4%                                        | 9.4%                                         |
| Lymphoma                        | 4              | 4    | 4    | 3.7 (3.3–4.2)                        | 4.9 (4.4–5.4)    | 4.8 (4.3–5.3)    | 247             | 381   | 394   | 29.7%                                        | –2.0%                                        |
| Leukaemia                       | 6              | 6    | 5    | 2.4 (2.0–2.8)                        | 3.4 (3.0–3.9)    | 3.8 (3.4–4.3)    | 150             | 260   | 303   | 58.3%                                        | 11.8%                                        |
| Colon and rectum                | 9              | 9    | 5    | 1.8 (1.4–2.2)                        | 1.6 (1.3–1.9)    | 3.8 (3.4–4.3)    | 91              | 126   | 307   | 111.1%                                       | 137.5%                                       |
| Cervix uteri                    | 2              | 5    | 7    | 6.1 (5.5–6.9)                        | 3.8 (3.3–4.2)    | 3.5 (3.1–4.0)    | 337             | 301   | 288   | –42.6%                                       | –7.9%                                        |
| Brain and other nervous system  | 7              | 7    | 8    | 2.3 (2.0–2.7)                        | 3.0 (2.6–3.4)    | 2.5 (2.1–2.8)    | 147             | 227   | 197   | 8.7%                                         | –16.7%                                       |
| Corpus and uterus               | 10             | 10   | 9    | 1.7 (1.3–2.1)                        | 1.5 (1.2–1.8)    | 2.1 (1.8–2.5)    | 80              | 118   | 170   | 23.5%                                        | 40.0%                                        |
| Ovary                           | 7              | 8    | 10   | 2.3 (1.9–2.8)                        | 1.8 (1.5–2.2)    | 1.8 (1.5–2.1)    | 135             | 143   | 143   | –21.7%                                       | 0.0%                                         |

Rank is based on age-adjusted incidence rate. Age-adjusted incidence rates are per 100,000 population and age-adjusted to the 2000 United States standard population. Incidence count is the number of cancer occurrences. CI, confidence interval.

**Table S4** Incidence rate changes from 1975–2016 of the 10 leading cancers by age group (40–49 years) in the United States

| Cancer                      | Incidence rank |      |      | Age-adjusted incidence rate (95% CI) |                     |                     | Incidence count |       |       | Relative change in incidence (2016 vs. 1975) | Relative change in incidence (2016 vs. 2000) |
|-----------------------------|----------------|------|------|--------------------------------------|---------------------|---------------------|-----------------|-------|-------|----------------------------------------------|----------------------------------------------|
|                             | 1975           | 2000 | 2016 | 1975                                 | 2000                | 2016                | 1975            | 2000  | 2016  |                                              |                                              |
| <b>Male (40–49 years)</b>   |                |      |      |                                      |                     |                     |                 |       |       |                                              |                                              |
| All malignant cancers       |                |      |      | 187.4 (179.5–195.7)                  | 215.8 (209.5–222.3) | 193.4 (187.3–199.6) | 2,090           | 4,449 | 3,863 | 3.2%                                         | –10.4%                                       |
| Colon and rectum            | 2              | 2    | 1    | 20.4 (17.8–23.2)                     | 22.2 (20.2–24.3)    | 28.1 (25.8–30.5)    | 229             | 457   | 564   | 37.7%                                        | 26.6%                                        |
| Melanoma of the skin        | 3              | 4    | 2    | 12.5 (10.4–14.7)                     | 21.2 (19.3–23.3)    | 19.4 (17.5–21.4)    | 136             | 437   | 382   | 55.2%                                        | –8.5%                                        |
| Kidney and renal pelvis     | 6              | 6    | 3    | 7.2 (5.7–8.9)                        | 10.6 (9.2–12.1)     | 17.6 (15.8–19.5)    | 79              | 218   | 350   | 144.4%                                       | 66.0%                                        |
| Prostate                    | 16             | 3    | 4    | 3.0 (2.1–4.2)                        | 22.0 (20.0–24.1)    | 16.1 (14.5–18.0)    | 35              | 454   | 333   | 436.7%                                       | –26.8%                                       |
| Lymphoma                    | 4              | 1    | 5    | 12.2 (10.2–14.5)                     | 22.5 (20.5–24.6)    | 15.8 (14.1–17.6)    | 134             | 463   | 313   | 29.5%                                        | –29.8%                                       |
| Thyroid                     | 12             | 12   | 6    | 4.9 (3.6–6.4)                        | 5.2 (4.2–6.2)       | 10.4 (9.0–11.9)     | 53              | 106   | 202   | 112.2%                                       | 100.0%                                       |
| Lung and bronchus           | 1              | 5    | 7    | 44.2 (40.4–48.3)                     | 20.1 (18.2–22.1)    | 9.3 (8.0–10.7)      | 500             | 415   | 190   | –79.0%                                       | –53.7%                                       |
| Testis                      | 11             | 7    | 8    | 5.1 (3.8–6.6)                        | 9.5 (8.3–11.0)      | 9.0 (7.7–10.4)      | 54              | 196   | 173   | 76.5%                                        | –5.3%                                        |
| Leukaemia                   | 10             | 9    | 9    | 5.4 (4.1–7.0)                        | 7.7 (6.5–9.0)       | 8.7 (7.4–10.1)      | 60              | 158   | 171   | 61.1%                                        | 13.0%                                        |
| Urinary bladder             | 5              | 8    | 10   | 10.4 (8.6–12.4)                      | 9.4 (8.1–10.8)      | 6.0 (5.0–7.2)       | 116             | 194   | 121   | –42.3%                                       | –36.2%                                       |
| <b>Female (40–49 years)</b> |                |      |      |                                      |                     |                     |                 |       |       |                                              |                                              |
| All malignant cancers       |                |      |      | 338.8 (328.2–349.7)                  | 340.4 (332.6–348.4) | 363.2 (354.9–371.6) | 3,879           | 7,170 | 7,323 | 7.2%                                         | 6.7%                                         |
| Breast                      | 1              | 1    | 1    | 145.6 (138.7–152.8)                  | 155.9 (150.6–161.3) | 159.5 (154.0–165.1) | 1,669           | 3,286 | 3,222 | 9.5%                                         | 2.3%                                         |
| Thyroid                     | 8              | 4    | 2    | 9.8 (8.0–11.9)                       | 18.0 (16.2–19.9)    | 34.5 (32.0–37.2)    | 107             | 378   | 684   | 252.0%                                       | 91.7%                                        |
| Colon and rectum            | 5              | 6    | 3    | 22.2 (19.5–25.1)                     | 15.8 (14.1–17.6)    | 26.2 (24.1–28.6)    | 256             | 333   | 531   | 18.0%                                        | 65.8%                                        |
| Melanoma of the skin        | 7              | 2    | 4    | 11.0 (9.1–13.1)                      | 22.3 (20.3–24.4)    | 24.8 (22.6–27.0)    | 124             | 468   | 497   | 125.5%                                       | 11.2%                                        |
| Corpus and uterus           | 2              | 3    | 5    | 24.4 (21.7–27.5)                     | 19.1 (17.2–21.0)    | 20.8 (18.9–22.9)    | 285             | 402   | 423   | –14.8%                                       | 8.9%                                         |
| Cervix uteri                | 3              | 7    | 6    | 22.7 (20.0–25.6)                     | 13.7 (12.1–15.4)    | 11.8 (10.3–13.4)    | 254             | 287   | 232   | –48.0%                                       | –13.9%                                       |
| Lymphoma                    | 9              | 9    | 7    | 8.6 (7.0–10.5)                       | 12.6 (11.1–14.2)    | 11.1 (9.7–12.7)     | 98              | 264   | 226   | 29.1%                                        | –11.9%                                       |
| Lung and bronchus           | 4              | 5    | 8    | 22.4 (19.7–25.3)                     | 17.4 (15.7–19.3)    | 10.6 (9.2–12.1)     | 259             | 367   | 218   | –52.7%                                       | –39.1%                                       |
| Ovary                       | 6              | 8    | 9    | 21.0 (18.4–23.8)                     | 13.0 (11.5–14.7)    | 9.7 (8.4–11.1)      | 240             | 275   | 195   | –53.8%                                       | –25.4%                                       |
| Kidney and renal pelvis     | 14             | 10   | 10   | 3.0 (2.1–4.2)                        | 5.4 (4.4–6.5)       | 7.8 (6.6–9.1)       | 34              | 113   | 158   | 160.0%                                       | 44.4%                                        |

Rank is based on age-adjusted incidence rate. Age-adjusted incidence rates are per 100,000 population and age-adjusted to the 2000 United States standard population. Incidence count is the number of cancer occurrences. CI, confidence interval.

**Table S5** Incidence rate changes from 1975–2016 of the 10 leading cancers by age group (50–59 years) in the United States

| Cancer                      | Incidence rank |      |      | Age-adjusted incidence rate (95% CI) |                     |                      | Incidence count |        |        | Relative change in incidence (2016 vs. 1975) | Relative change in incidence (2016 vs. 2000) |
|-----------------------------|----------------|------|------|--------------------------------------|---------------------|----------------------|-----------------|--------|--------|----------------------------------------------|----------------------------------------------|
|                             | 1975           | 2000 | 2016 | 1975                                 | 2000                | 2016                 | 1975            | 2000   | 2016   |                                              |                                              |
| <b>Male (50–59 years)</b>   |                |      |      |                                      |                     |                      |                 |        |        |                                              |                                              |
| All malignant cancers       |                |      |      | 559.9 (545.8–574.4)                  | 737.9 (724.0–752.1) | 646.1 (635.1–657.2)  | 5,972           | 10,705 | 13,426 | 15.4%                                        | –12.4%                                       |
| Prostate                    | 3              | 1    | 1    | 44.4 (40.6–48.6)                     | 236.4 (228.6–244.5) | 168.6 (163.1–) 174.3 | 481             | 3,415  | 3,556  | 279.7%                                       | –28.7%                                       |
| Colon and rectum            | 2              | 3    | 2    | 71.0 (66.1–76.3)                     | 73.9 (69.5–78.4)    | 77.1 (73.3–81.1)     | 760             | 1,074  | 1,557  | 8.6%                                         | 4.3%                                         |
| Lung and bronchus           | 1              | 2    | 3    | 150.3 (143.0–157.9)                  | 87.1 (82.3–92.0)    | 56.0 (52.8–59.3)     | 1,602           | 1,261  | 1,174  | –62.7%                                       | –35.7%                                       |
| Melanoma of the skin        | 11             | 4    | 4    | 15.1 (12.9–17.7)                     | 39.4 (36.2–42.7)    | 44.0 (41.2–47.0)     | 160             | 573    | 915    | 191.4%                                       | 11.7%                                        |
| Kidney and renal pelvis     | 7              | 7    | 5    | 20.1 (17.5–23.0)                     | 29.8 (27.0–32.7)    | 37.6 (35.0–40.4)     | 214             | 433    | 778    | 87.1%                                        | 26.2%                                        |
| Lymphoma                    | 5              | 6    | 6    | 23.8 (21.0–27.0)                     | 32.7 (29.8–35.8)    | 31.4 (29.0–33.9)     | 252             | 476    | 650    | 31.9%                                        | –4.0%                                        |
| Urinary bladder             | 4              | 5    | 7    | 35.8 (32.3–39.5)                     | 36.8 (33.7–40.1)    | 29.2 (26.9–31.7)     | 382             | 534    | 614    | –18.4%                                       | –20.7%                                       |
| Liver                       | 17             | 10   | 8    | 6.2 (4.8–7.9)                        | 14.5 (12.6–16.6)    | 19.9 (18.1–22.0)     | 67              | 211    | 424    | 221.0%                                       | 37.2%                                        |
| Leukaemia                   | 10             | 8    | 9    | 15.5 (13.2–18.0)                     | 18.9 (16.8–21.3)    | 18.5 (16.7–20.5)     | 165             | 275    | 384    | 19.4%                                        | –2.1%                                        |
| Pancreas                    | 9              | 9    | 10   | 17.6 (15.2–20.4)                     | 16.9 (14.8–19.1)    | 16.2 (14.5–18.1)     | 187             | 245    | 335    | –8.0%                                        | –4.1%                                        |
| <b>Female (50–59 years)</b> |                |      |      |                                      |                     |                      |                 |        |        |                                              |                                              |
| All malignant cancers       |                |      |      | 674.7 (659.6–690.0)                  | 703.7 (690.5–717.2) | 683.8 (672.6–695.1)  | 7,637           | 10,685 | 14,541 | 1.3%                                         | –2.8%                                        |
| Breast                      | 1              | 1    | 1    | 219.0 (210.4–227.8)                  | 293.6 (285.1–302.4) | 256.8 (249.9–263.8)  | 2,462           | 4,462  | 5,412  | 17.3%                                        | –12.5%                                       |
| Corpus and uterus           | 2              | 3    | 2    | 112.9 (106.8–119.2)                  | 55.3 (51.6–59.2)    | 62.1 (58.8–65.6)     | 1,286           | 839    | 1,355  | –45.0%                                       | 12.3%                                        |
| Colon and rectum            | 3              | 4    | 3    | 63.9 (59.4–68.8)                     | 54.3 (50.7–58.2)    | 55.2 (52.0–58.5)     | 729             | 825    | 1,143  | –13.6%                                       | 1.7%                                         |
| Lung and bronchus           | 4              | 2    | 4    | 57.6 (53.3–62.2)                     | 70.9 (66.7–75.3)    | 55.0 (51.9–58.2)     | 655             | 1,072  | 1,205  | –4.5%                                        | –22.4%                                       |
| Thyroid                     | 15             | 8    | 5    | 7.5 (6.0–9.3)                        | 16.9 (14.9–19.1)    | 36.3 (33.7–39.0)     | 85              | 258    | 754    | 384.0%                                       | 114.8%                                       |
| Melanoma of the skin        | 8              | 6    | 6    | 12.3 (10.3–14.5)                     | 26.4 (23.8–29.1)    | 34.0 (31.5–36.6)     | 137             | 401    | 720    | 176.4%                                       | 28.8%                                        |
| Lymphoma                    | 7              | 7    | 7    | 17.2 (14.9–19.8)                     | 22.3 (20.0–24.8)    | 22.8 (20.8–24.9)     | 194             | 339    | 483    | 32.6%                                        | 2.2%                                         |
| Ovary                       | 5              | 5    | 8    | 34.1 (30.8–37.7)                     | 29.0 (26.3–31.8)    | 18.2 (16.4–20.1)     | 385             | 440    | 387    | –46.6%                                       | –37.2%                                       |
| Kidney and renal pelvis     | 14             | 9    | 9    | 8.1 (6.6–10.0)                       | 13.9 (12.1–15.9)    | 17.1 (15.4–19.0)     | 92              | 211    | 366    | 111.1%                                       | 23.0%                                        |
| Pancreas                    | 11             | 11   | 10   | 10.2 (8.5–12.3)                      | 10.8 (9.2–12.6)     | 13.2 (11.7–14.8)     | 117             | 164    | 285    | 29.4%                                        | 22.2%                                        |

Rank is based on age-adjusted incidence rate. Age-adjusted incidence rates are per 100,000 population and age-adjusted to the 2000 United States standard population. Incidence count is the number of cancer occurrences. CI, confidence interval.

**Table S6** Incidence rate changes from 1975–2016 of the 10 leading cancers by age group (60–69 years) in the United States

| Cancer                      | Incidence rank |      |      | Age-adjusted incidence rate (95% CI) |                           |                           | Incidence count |        |        | Relative change in incidence (2016 vs. 1975) | Relative change in incidence (2016 vs. 2000) |
|-----------------------------|----------------|------|------|--------------------------------------|---------------------------|---------------------------|-----------------|--------|--------|----------------------------------------------|----------------------------------------------|
|                             | 1975           | 2000 | 2016 | 1975                                 | 2000                      | 2016                      | 1975            | 2000   | 2016   |                                              |                                              |
| <b>Male (60–69 years)</b>   |                |      |      |                                      |                           |                           |                 |        |        |                                              |                                              |
| All malignant cancers       |                |      |      | 1,385.7 (1,358.1–1,413.6)            | 1,994.6 (1,964.3–2,025.2) | 1,546.1 (1,526.8–1,565.6) | 9,670           | 16,579 | 24,507 | 11.6%                                        | –22.5%                                       |
| Prostate                    | 2              | 1    | 1    | 243.2 (231.6–255.1)                  | 783.0 (764.0–802.2)       | 512.5 (501.5–523.8)       | 1,677           | 6,502  | 8,117  | 110.7%                                       | –34.5%                                       |
| Lung and bronchus           | 1              | 2    | 2    | 331.8 (318.4–345.7)                  | 304.8 (293.1–316.9)       | 178.5 (171.9–185.2)       | 2,317           | 2,535  | 2,824  | –46.2%                                       | –41.4%                                       |
| Colon and rectum            | 3              | 3    | 3    | 199.9 (189.5–210.7)                  | 198.9 (189.5–208.8)       | 118.2 (112.9–123.7)       | 1,394           | 1,653  | 1,877  | –40.9%                                       | –40.6%                                       |
| Melanoma of the skin        | 14             | 6    | 4    | 16.9 (14.0–20.2)                     | 63.9 (58.5–69.5)          | 87.7 (83.2–92.4)          | 120             | 531    | 1,391  | 418.9%                                       | 37.2%                                        |
| Urinary bladder             | 4              | 4    | 5    | 98.0 (90.8–105.7)                    | 113.0 (105.9–120.5)       | 84.0 (79.5–88.6)          | 686             | 939    | 1,327  | –14.3%                                       | –25.7%                                       |
| Kidney and renal pelvis     | 10             | 7    | 6    | 31.0 (27.0–35.4)                     | 61.0 (55.8–66.6)          | 67.9 (64.0–72.1)          | 217             | 509    | 1,078  | 119.0%                                       | 11.3%                                        |
| Lymphoma                    | 7              | 5    | 7    | 44.6 (39.8–49.8)                     | 68.1 (62.6–73.9)          | 64.3 (60.4–68.3)          | 313             | 566    | 1,020  | 44.2%                                        | –5.6%                                        |
| Liver                       | 16             | 14   | 8    | 12.4 (9.9–15.3)                      | 22.3 (19.2–25.7)          | 57.8 (54.1–61.6)          | 86              | 186    | 920    | 366.1%                                       | 159.2%                                       |
| Pancreas                    | 6              | 9    | 9    | 49.8 (44.7–55.3)                     | 45.2 (40.7–50.0)          | 46.2 (42.9–49.6)          | 348             | 375    | 732    | –7.2%                                        | 2.2%                                         |
| Leukaemia                   | 8              | 8    | 10   | 39.8 (35.3–44.8)                     | 45.5 (41.0–50.3)          | 45.5 (42.2–48.9)          | 279             | 378    | 721    | 14.3%                                        | 0.0%                                         |
| <b>Female (60–69 years)</b> |                |      |      |                                      |                           |                           |                 |        |        |                                              |                                              |
| All malignant cancers       |                |      |      | 1,051.8 (1,029.6–1,074.3)            | 1,246.7 (1,224.3–1,269.5) | 1,143.9 (1,128.1–1,159.9) | 8,540           | 11,730 | 20,058 | 8.8%                                         | –8.2%                                        |
| Breast                      | 1              | 1    | 1    | 279.8 (268.5–291.6)                  | 414.5 (401.6–427.7)       | 382.4 (373.3–391.7)       | 2,273           | 3,900  | 6,708  | 36.7%                                        | –7.7%                                        |
| Lung and bronchus           | 4              | 2    | 2    | 90.8 (84.3–97.5)                     | 197.7 (188.8–206.9)       | 138.4 (133.0–144.1)       | 738             | 1,860  | 2,425  | 52.4%                                        | –30.0%                                       |
| Corpus and uterus           | 3              | 4    | 3    | 138.5 (130.5–146.8)                  | 90.2 (84.3–96.5)          | 110.8 (105.9–115.8)       | 1,131           | 849    | 1,944  | –20.0%                                       | 22.8%                                        |
| Colon and rectum            | 2              | 3    | 4    | 155.3 (146.8–164.1)                  | 136.6 (129.2–144.2)       | 81.4 (77.3–85.8)          | 1,256           | 1,285  | 1,427  | –47.6%                                       | –40.4%                                       |
| Melanoma of the skin        | 13             | 8    | 5    | 14.0 (11.5–16.8)                     | 28.8 (25.5–32.4)          | 46.5 (43.3–49.8)          | 113             | 271    | 816    | 232.1%                                       | 61.5%                                        |
| Lymphoma                    | 7              | 5    | 6    | 29.0 (25.4–32.9)                     | 45.6 (41.4–50.1)          | 45.4 (42.3–48.7)          | 235             | 429    | 796    | 56.6%                                        | –0.4%                                        |
| Pancreas                    | 8              | 8    | 7    | 28.7 (25.1–32.7)                     | 28.8 (25.5–32.4)          | 34.5 (31.8–37.4)          | 232             | 271    | 604    | 20.2%                                        | 19.8%                                        |
| Thyroid                     | 16             | 13   | 8    | 8.4 (6.6–10.7)                       | 15.4 (13.0–18.1)          | 33.4 (30.8–36.2)          | 69              | 145    | 587    | 297.6%                                       | 116.9%                                       |
| Kidney and renal pelvis     | 14             | 7    | 9    | 13.9 (11.5–16.7)                     | 28.9 (25.6–32.6)          | 31.6 (29.0–34.3)          | 113             | 272    | 554    | 127.3%                                       | 9.3%                                         |
| Ovary                       | 5              | 6    | 10   | 47.7 (43.1–52.7)                     | 42.2 (38.1–46.6)          | 28.9 (26.5–31.5)          | 388             | 397    | 507    | –39.4%                                       | –31.5%                                       |

Rank is based on age-adjusted incidence rate. Age-adjusted incidence rates are per 100,000 population and age-adjusted to the 2000 United States standard population. Incidence count is the number of cancer occurrences. CI, confidence interval.

**Table S7** Incidence rate changes from 1975–2016 for the 10 leading cancers by age group (≥70 years) in the United States

| Cancer                    | Incidence rank |      |      | Age-adjusted incidence rate (95% CI) |                           |                           | Incidence count |        |        | Relative change in incidence (2016 vs. 1975) | Relative change in incidence (2016 vs. 2000) |
|---------------------------|----------------|------|------|--------------------------------------|---------------------------|---------------------------|-----------------|--------|--------|----------------------------------------------|----------------------------------------------|
|                           | 1975           | 2000 | 2016 | 1975                                 | 2000                      | 2016                      | 1975            | 2000   | 2016   |                                              |                                              |
| <b>Male (≥70 years)</b>   |                |      |      |                                      |                           |                           |                 |        |        |                                              |                                              |
| All malignant cancers     |                |      |      | 2,777.0 (2,728.9–2825.7)             | 3,220.3 (3,183.1–3,257.9) | 2,492.0 (2,463.9–2,520.4) | 13,390          | 28,992 | 30,378 | –10.3%                                       | –22.6%                                       |
| Prostate                  | 1              | 1    | 1    | 768.7 (743.1–794.9)                  | 1,046.5 (1,025.5–1,067.9) | 539.4 (526.5–552.6)       | 3,608           | 9,564  | 6,703  | –29.8%                                       | –48.5%                                       |
| Lung and bronchus         | 3              | 2    | 2    | 443.2 (424.6–462.4)                  | 506.1 (491.5–521.1)       | 391.4 (380.3–402.8)       | 2,245           | 4,589  | 4,732  | –11.7%                                       | –22.7%                                       |
| Urinary bladder           | 4              | 4    | 3    | 228.8 (215.1–243.2)                  | 267.3 (256.6–278.4)       | 247.5 (238.6–256.6)       | 1,084           | 2,372  | 2,978  | 8.2%                                         | –7.4%                                        |
| Colon and rectum          | 2              | 3    | 4    | 454.6 (435.1–474.7)                  | 395.4 (382.3–408.9)       | 207.5 (199.4–215.8)       | 2,171           | 3,504  | 2,510  | –54.4%                                       | –47.5%                                       |
| Melanoma of the skin      | 14             | 6    | 5    | 22.1 (18.0–26.8)                     | 99.8 (93.3–106.7)         | 167.4 (160.2–174.9)       | 107             | 891    | 2,040  | 657.5%                                       | 67.7%                                        |
| Lymphoma                  | 8              | 5    | 6    | 63.5 (56.4–71.1)                     | 125.7 (118.4–133.4)       | 131.3 (124.9–138.0)       | 312             | 1,126  | 1,592  | 106.8%                                       | 4.5%                                         |
| Leukaemia                 | 6              | 7    | 7    | 102.5 (93.3–112.4)                   | 98.1 (91.6–105.0)         | 93.2 (87.8–98.8)          | 481             | 864    | 1,134  | –9.1%                                        | –5.0%                                        |
| Pancreas                  | 7              | 9    | 8    | 98.4 (89.6–107.9)                    | 77.5 (71.8–83.6)          | 90.2 (84.9–95.8)          | 477             | 687    | 1,093  | –8.3%                                        | 16.4%                                        |
| Kidney and renal pelvis   | 9              | 8    | 9    | 45.5 (39.7–51.9)                     | 81.3 (75.5–87.5)          | 89.7 (84.4–95.1)          | 231             | 735    | 1,100  | 97.1%                                        | 10.3%                                        |
| Stomach                   | 5              | 10   | 10   | 111.8 (102.2–122.1)                  | 76.6 (70.9–82.7)          | 52.4 (48.4–56.7)          | 525             | 676    | 632    | –53.1%                                       | –31.6%                                       |
| <b>Female (≥70 years)</b> |                |      |      |                                      |                           |                           |                 |        |        |                                              |                                              |
| All malignant cancers     |                |      |      | 1,459.1 (1,432.5–1,486.0)            | 1,839.3 (1,816.7–1,862.1) | 1,715.6 (1,695.4–1,736.1) | 11,543          | 25,504 | 28,185 | 17.6%                                        | –6.7%                                        |
| Breast                    | 1              | 1    | 1    | 335.2 (322.6–348.3)                  | 458.2 (446.9–469.7)       | 442.4 (432.1–452.9)       | 2,660           | 6,287  | 7,145  | 32.0%                                        | –3.4%                                        |
| Lung and bronchus         | 4              | 3    | 2    | 79.5 (73.4–86.0)                     | 278.9 (270.1–288.0)       | 291.6 (283.2–300.2)       | 635             | 3,800  | 4,714  | 266.8%                                       | 4.6%                                         |
| Colon and rectum          | 2              | 2    | 3    | 334.3 (321.6–347.4)                  | 297.7 (288.7–306.9)       | 162.3 (156.2–168.6)       | 2,630           | 4,207  | 2,749  | –51.5%                                       | –45.5%                                       |
| Corpus and uterus         | 3              | 4    | 4    | 88.0 (81.7–94.8)                     | 90.0 (85.0–) 95.2         | 92.0 (87.3–96.9)          | 711             | 1,228  | 1,480  | 4.5%                                         | 2.2%                                         |
| Lymphoma                  | 9              | 5    | 5    | 48.9 (44.1–54.0)                     | 86.5 (81.7–91.6)          | 86.3 (81.8–91.0)          | 387             | 1,205  | 1,426  | 76.5%                                        | –0.2%                                        |
| Pancreas                  | 5              | 6    | 6    | 57.8 (52.6–63.4)                     | 65.4 (61.3–69.8)          | 72.8 (68.8–77.1)          | 457             | 919    | 1,229  | 26.0%                                        | 11.3%                                        |
| Melanoma of the skin      | 15             | 12   | 7    | 14.1 (11.6–16.9)                     | 37.0 (33.8–40.3)          | 60.5 (56.8–64.4)          | 112             | 510    | 1,013  | 329.1%                                       | 63.5%                                        |
| Urinary bladder           | 6              | 7    | 8    | 53.4 (48.4–58.8)                     | 61.7 (57.7–66.0)          | 59.6 (55.9–63.5)          | 419             | 869    | 1,005  | 11.6%                                        | –3.4%                                        |
| Leukaemia                 | 7              | 8    | 9    | 51.7 (46.7–57.0)                     | 54.4 (50.6–58.4)          | 48.4 (45.0–51.9)          | 405             | 769    | 809    | –6.4%                                        | –11.0%                                       |
| Kidney and renal pelvis   | 13             | 10   | 10   | 20.0 (17.0–23.3)                     | 37.5 (34.3–40.9)          | 43.9 (40.7–47.3)          | 161             | 518    | 707    | 119.5%                                       | 17.1%                                        |

Rank is based on age-adjusted incidence rate. Age-adjusted incidence rates are per 100,000 population and age-adjusted to the 2000 United States standard population. Incidence count is the number of cancer occurrences. CI, confidence interval.

**Table S8** Mortality rate changes from 1975–2016 of the 10 leading causes of cancer death in males by race and ethnicity in the United States

| All causes                           | Mortality rank |      |      | Age-adjusted mortality rate<br>(95% CI) |                     |                     | Death count |         |         | Relative change<br>in mortality<br>(2016 vs. 1975) | Relative change<br>in mortality<br>(2016 vs. 2000) |
|--------------------------------------|----------------|------|------|-----------------------------------------|---------------------|---------------------|-------------|---------|---------|----------------------------------------------------|----------------------------------------------------|
|                                      | 1975           | 2000 | 2016 | 1975                                    | 2000                | 2016                | 1975        | 2000    | 2016    |                                                    |                                                    |
| <b>Male white</b>                    |                |      |      |                                         |                     |                     |             |         |         |                                                    |                                                    |
| All malignant cancers                |                |      |      | 254.0 (252.7–255.3)                     | 243.4 (242.4–244.3) | 186.3 (185.6–187.0) | 175,299     | 247,396 | 267,894 | –26.7%                                             | –23.5%                                             |
| Lung and bronchus                    | 1              | 1    | 1    | 75.5 (74.8–76.1)                        | 75.4 (74.9–75.9)    | 47.1 (46.7–47.4)    | 56,237      | 78,700  | 68,968  | –37.6%                                             | –37.5%                                             |
| Prostate                             | 3              | 2    | 2    | 29.1 (28.6–29.5)                        | 27.8 (27.4–28.1)    | 18.2 (18.0–18.4)    | 16,340      | 25,340  | 24,555  | –37.5%                                             | –34.5%                                             |
| Colon and rectum                     | 2              | 3    | 3    | 33.2 (32.8–33.7)                        | 24.5 (24.1–24.8)    | 15.9 (15.7–16.1)    | 21,737      | 24,549  | 22,805  | –52.1%                                             | –35.1%                                             |
| Pancreas                             | 4              | 4    | 4    | 13.6 (13.3–13.9)                        | 12.0 (11.8–12.2)    | 12.7 (12.5–12.9)    | 9,381       | 12,391  | 18,618  | –6.6%                                              | 5.8%                                               |
| Leukaemia                            | 6              | 6    | 5    | 11.3 (11.0–11.6)                        | 10.5 (10.3–10.7)    | 8.6 (8.5–8.8)       | 7,691       | 10,639  | 11,871  | –23.9%                                             | –18.1%                                             |
| Urinary bladder                      | 7              | 7    | 6    | 10.1 (9.8–10.4)                         | 7.9 (7.8–8.1)       | 8.0 (7.8–8.2)       | 6,159       | 7,620   | 10,958  | –20.8%                                             | 1.3%                                               |
| Lymphoma                             | 8              | 5    | 7    | 8.9 (8.7–9.1)                           | 11.2 (11.0–11.4)    | 7.6 (7.4–7.7)       | 6,546       | 11,454  | 10,577  | –14.6%                                             | –32.1%                                             |
| Oesophagus                           | 9              | 8    | 8    | 5.4 (5.2–5.6)                           | 7.6 (7.4–7.7)       | 7.4 (7.3–7.6)       | 3,889       | 7,986   | 11,127  | 37.0%                                              | –2.6%                                              |
| Liver                                | 13             | 12   | 9    | 3.4 (3.2–3.5)                           | 5.0 (4.9–5.1)       | 7.1 (7.0–7.2)       | 2,358       | 5,273   | 11,160  | 108.8%                                             | 42.0%                                              |
| Brain and other nervous system       | 11             | 10   | 10   | 5.2 (5.0–5.4)                           | 6.0 (5.8–6.1)       | 6.0 (5.8–6.1)       | 4,237       | 6,486   | 8,645   | 15.4%                                              | 0.0%                                               |
| <b>Male black</b>                    |                |      |      |                                         |                     |                     |             |         |         |                                                    |                                                    |
| All malignant cancers                |                |      |      | 320.5 (315.9–325.1)                     | 341.2 (337.3–345.1) | 221.6 (219.2–224.1) | 21,884      | 32,815  | 35,707  | –30.9%                                             | –35.1%                                             |
| Lung and bronchus                    | 1              | 1    | 1    | 91.0 (88.7–93.3)                        | 100.9 (98.8–102.9)  | 55.3 (54.1–56.6)    | 6,716       | 10,143  | 9,129   | –39.2%                                             | –45.2%                                             |
| Prostate                             | 2              | 2    | 2    | 55.5 (53.4–57.7)                        | 68.9 (67.0–70.8)    | 38.4 (37.3–39.5)    | 3,018       | 5,346   | 5,088   | –30.8%                                             | –44.3%                                             |
| Colon and rectum                     | 3              | 3    | 3    | 30.1 (28.6–31.6)                        | 35.0 (33.7–36.3)    | 23.0 (22.2–23.8)    | 1,905       | 3,316   | 3,786   | –23.6%                                             | –34.3%                                             |
| Pancreas                             | 6              | 4    | 4    | 16.3 (15.3–17.4)                        | 15.8 (15.0–16.6)    | 14.9 (14.2–15.5)    | 1,141       | 1,561   | 2,503   | –8.6%                                              | –5.7%                                              |
| Liver                                | 11             | 9    | 5    | 6.1 (5.6–6.8)                           | 8.6 (8.1–9.2)       | 11.2 (10.7–11.7)    | 457         | 966     | 2,231   | 83.6%                                              | 30.2%                                              |
| Stomach                              | 4              | 5    | 6    | 21.0 (19.9–22.3)                        | 12.8 (12.0–13.5)    | 7.9 (7.5–8.4)       | 1,379       | 1,218   | 1,280   | –62.4%                                             | –38.3%                                             |
| Myeloma                              | 9              | 8    | 7    | 6.4 (5.8–7.1)                           | 8.8 (8.1–9.4)       | 7.3 (6.8–7.8)       | 433         | 823     | 1,109   | 14.1%                                              | –17.0%                                             |
| Leukaemia                            | 7              | 7    | 8    | 8.6 (7.8–9.3)                           | 9.1 (8.5–9.7)       | 6.9 (6.4–7.3)       | 631         | 933     | 1,083   | –19.8%                                             | –24.2%                                             |
| Urinary bladder                      | 8              | 12   | 9    | 6.9 (6.2–7.6)                           | 5.7 (5.2–6.2)       | 5.3 (4.9–5.7)       | 421         | 466     | 733     | –23.2%                                             | –7.0%                                              |
| Oesophagus                           | 5              | 6    | 10   | 17.0 (16.0–18.0)                        | 10.9 (10.3–11.6)    | 5.2 (4.8–5.6)       | 1,267       | 1,170   | 908     | –69.4%                                             | –52.3%                                             |
| Kidney and renal pelvis              | 13             | 11   | 10   | 4.1 (3.7–4.7)                           | 6.3 (5.8–6.8)       | 5.2 (4.8–5.6)       | 295         | 632     | 854     | 26.8%                                              | –17.5%                                             |
| <b>Male other race and ethnicity</b> |                |      |      |                                         |                     |                     |             |         |         |                                                    |                                                    |
| All malignant cancers                |                |      |      | 145.2 (137.1–153.6)                     | 150.9 (146.8–155.2) | 116.1 (113.8–118.3) | 1,403       | 5,861   | 10,967  | –20.0%                                             | –23.1%                                             |
| Lung and bronchus                    | 1              | 1    | 1    | 35.4 (31.5–39.6)                        | 41.0 (38.8–43.2)    | 28.8 (27.7–30.0)    | 344         | 1,567   | 2,678   | –18.6%                                             | –29.8%                                             |
| Colon and rectum                     | 2              | 2    | 2    | 19.1 (16.2–22.3)                        | 16.4 (15.0–17.8)    | 10.8 (10.1–11.5)    | 177         | 619     | 1,051   | –43.5%                                             | –34.1%                                             |
| Liver                                | 4              | 4    | 3    | 9.7 (7.8–11.9)                          | 13.2 (12.1–14.4)    | 10.3 (9.7–11.0)     | 102         | 604     | 1,067   | 6.2%                                               | –22.0%                                             |
| Prostate                             | 5              | 3    | 4    | 9.4 (7.2–12.0)                          | 13.7 (12.3–15.2)    | 9.2 (8.5–9.9)       | 68          | 392     | 727     | –2.1%                                              | –32.8%                                             |
| Pancreas                             | 6              | 6    | 5    | 8.9 (7.0–11.1)                          | 7.6 (6.7–8.6)       | 8.2 (7.6–8.8)       | 84          | 285     | 778     | –7.9%                                              | 7.9%                                               |
| Stomach                              | 3              | 5    | 6    | 17.8 (14.9–21.0)                        | 11.4 (10.2–12.6)    | 6.6 (6.1–7.2)       | 158         | 422     | 617     | –62.9%                                             | –42.1%                                             |
| Lymphoma                             | 8              | 7    | 7    | 4.8 (3.5–6.3)                           | 6.5 (5.7–7.4)       | 4.7 (4.3–5.2)       | 52          | 259     | 439     | –2.1%                                              | –27.7%                                             |
| Leukaemia                            | 7              | 8    | 8    | 5.2 (3.8–6.9)                           | 5.1 (4.4–5.9)       | 4.2 (3.8–4.7)       | 60          | 231     | 406     | –19.2%                                             | –17.6%                                             |
| Urinary bladder                      | 11             | 11   | 9    | 2.9 (1.8–4.4)                           | 2.4 (1.9–3.0)       | 3.1 (2.7–3.5)       | 24          | 77      | 250     | 6.9%                                               | 29.2%                                              |
| Kidney and renal pelvis              | 10             | 9    | 10   | 3.1 (2.1–4.5)                           | 3.3 (2.7–3.9)       | 3.0 (2.7–3.4)       | 31          | 142     | 296     | –3.2%                                              | –9.1%                                              |

Rank is based on the age-adjusted mortality rate. Age-adjusted mortality rates are per 100,000 population and age-adjusted to the 2000 United States standard population. Death count is the number of cancer deaths. Other race and ethnicity includes American Indian/AK Native, Asian/Pacific Islander. CI, confidence interval.



**Table S9** Mortality rate changes from 1975–2016 of the 10 leading causes of cancer death in females by race and ethnicity in the United States

| All causes                             | Mortality rank |      |      | Age-adjusted mortality rate (95% CI) |                     |                     | Death count |         |         | Relative change in mortality (2016 vs. 1975) | Relative change in mortality (2016 vs. 2000) |
|----------------------------------------|----------------|------|------|--------------------------------------|---------------------|---------------------|-------------|---------|---------|----------------------------------------------|----------------------------------------------|
|                                        | 1975           | 2000 | 2016 | 1975                                 | 2000                | 2016                | 1975        | 2000    | 2016    |                                              |                                              |
| <b>Female white</b>                    |                |      |      |                                      |                     |                     |             |         |         |                                              |                                              |
| All malignant cancers                  |                |      |      | 159.0 (158.2–159.8)                  | 166.0 (165.3–166.7) | 134.7 (134.2–135.3) | 148,711     | 232,608 | 238,072 | –15.3%                                       | –18.9%                                       |
| Lung and bronchus                      | 3              | 1    | 1    | 17.7 (17.4–17.9)                     | 42.1 (41.7–42.4)    | 33.2 (32.9–33.5)    | 16,883      | 58,133  | 59,158  | 87.6%                                        | –21.1%                                       |
| Breast                                 | 1              | 2    | 2    | 31.8 (31.4–32.2)                     | 26.2 (25.9–26.4)    | 19.6 (19.4–19.8)    | 29,313      | 35,767  | 33,749  | –38.4%                                       | –25.2%                                       |
| Colon and rectum                       | 2              | 3    | 3    | 25.1 (24.7–25.4)                     | 17.0 (16.8–17.2)    | 11.3 (11.1–11.4)    | 23,333      | 24,913  | 20,155  | –55.0%                                       | –33.5%                                       |
| Pancreas                               | 5              | 5    | 4    | 8.3 (8.1–8.5)                        | 9.0 (8.8–9.2)       | 9.5 (9.4–9.7)       | 7,876       | 12,909  | 17,262  | 14.5%                                        | 5.6%                                         |
| Ovary                                  | 4              | 4    | 5    | 10.2 (10.0–10.4)                     | 9.2 (9.1–9.4)       | 7.0 (6.9–7.2)       | 9,610       | 12,731  | 12,290  | –31.4%                                       | –23.9%                                       |
| Leukaemia                              | 6              | 7    | 6    | 6.3 (6.1–6.5)                        | 6.0 (5.9–6.2)       | 4.9 (4.8–5.0)       | 5,836       | 8,599   | 8,608   | –22.2%                                       | –18.3%                                       |
| Lymphoma                               | 7              | 6    | 7    | 5.9 (5.7–6.0)                        | 7.4 (7.3–7.6)       | 4.6 (4.5–4.7)       | 5,532       | 10,594  | 8,298   | –22.0%                                       | –37.8%                                       |
| Corpus and uterus                      | 9              | 9    | 7    | 5.1 (4.9–5.2)                        | 3.8 (3.7–3.9)       | 4.6 (4.5–4.7)       | 4,832       | 5,397   | 8,229   | –9.8%                                        | 21.1%                                        |
| Brain and other nervous system         | 11             | 8    | 9    | 3.6 (3.5–3.7)                        | 3.9 (3.8–4.0)       | 4.0 (3.9–4.1)       | 3,454       | 5,186   | 6,584   | 11.1%                                        | 2.6%                                         |
| Myeloma                                | 14             | 10   | 10   | 2.2 (2.1–2.3)                        | 3.0 (2.9–3.1)       | 2.4 (2.3–2.4)       | 2,137       | 4,247   | 4,262   | 9.1%                                         | –20.0%                                       |
| <b>Female black</b>                    |                |      |      |                                      |                     |                     |             |         |         |                                              |                                              |
| All malignant cancers                  |                |      |      | 174.2 (171.4–177.0)                  | 193.2 (191.0–195.5) | 151.3 (149.7–153.0) | 15,747      | 29,127  | 34,919  | –13.1%                                       | –21.7%                                       |
| Lung and bronchus                      | 3              | 1    | 1    | 17.3 (16.5–18.2)                     | 39.6 (38.6–40.7)    | 29.8 (29.1–30.5)    | 1,602       | 5,910   | 6,880   | 72.3%                                        | –24.7%                                       |
| Breast                                 | 1              | 2    | 2    | 29.5 (28.4–30.7)                     | 34.4 (33.4–35.3)    | 27.3 (26.6–28.0)    | 2,692       | 5,361   | 6,333   | –7.5%                                        | –20.6%                                       |
| Colon and rectum                       | 2              | 3    | 3    | 24.6 (23.5–25.7)                     | 23.9 (23.1–) 24.7   | 15.1 (14.6–15.6)    | 2,108       | 3,536   | 3,472   | –38.6%                                       | –36.8%                                       |
| Pancreas                               | 5              | 4    | 4    | 10.1 (9.5–10.8)                      | 12.7 (12.1–13.3)    | 12.1 (11.7–12.6)    | 912         | 1,858   | 2,774   | 19.8%                                        | –4.7%                                        |
| Corpus and uterus                      | 7              | 5    | 5    | 7.8 (7.2–8.4)                        | 7.2 (6.8–7.7)       | 8.7 (8.3–9.1)       | 710         | 1,060   | 2,067   | 11.5%                                        | 20.8%                                        |
| Ovary                                  | 8              | 6    | 6    | 7.2 (6.6–7.7)                        | 7.1 (6.7–7.6)       | 5.6 (5.3–) 5.9      | 681         | 1,073   | 1,328   | –22.2%                                       | –21.1%                                       |
| Myeloma                                | 10             | 7    | 7    | 4.4 (4.0–4.9)                        | 6.7 (6.3–7.2)       | 5.1 (4.8–5.4)       | 396         | 989     | 1,126   | 15.9%                                        | –23.9%                                       |
| Leukaemia                              | 9              | 10   | 8    | 5.1 (4.7–5.6)                        | 5.3 (4.9–5.6)       | 4.5 (4.2–4.8)       | 496         | 820     | 1,008   | –11.8%                                       | –15.1%                                       |
| Stomach                                | 6              | 8    | 9    | 8.6 (8.0–9.3)                        | 6.5 (6.1–6.9)       | 3.5 (3.3–3.8)       | 732         | 958     | 786     | –59.3%                                       | –46.2%                                       |
| Liver                                  | 14             | 13   | 9    | 2.6 (2.3–3.0)                        | 2.8 (2.6–3.1)       | 3.5 (3.3–3.8)       | 224         | 423     | 855     | 34.6%                                        | 25.0%                                        |
| <b>Female other race and ethnicity</b> |                |      |      |                                      |                     |                     |             |         |         |                                              |                                              |
| All malignant cancers                  |                |      |      | 98.8 (92.6–105.4)                    | 100.7 (97.9–103.6)  | 84.8 (83.2–86.5)    | 1,051       | 5,273   | 10,472  | –14.2%                                       | –15.8%                                       |
| Lung and bronchus                      | 4              | 1    | 1    | 9.6 (7.7–11.7)                       | 19.1 (17.9–20.4)    | 17.0 (16.3–17.8)    | 99          | 973     | 2,056   | 77.1%                                        | –11.0%                                       |
| Breast                                 | 1              | 2    | 2    | 13.1 (11.0–15.4)                     | 12.3 (11.4–13.3)    | 10.8 (10.2–11.4)    | 153         | 744     | 1,405   | –17.6%                                       | –12.2%                                       |
| Colon and rectum                       | 2              | 3    | 3    | 11.9 (9.7–14.3)                      | 10.0 (9.2–11.0)     | 8.2 (7.7–8.7)       | 112         | 501     | 1,017   | –31.1%                                       | –18.0%                                       |
| Pancreas                               | 6              | 4    | 4    | 4.5 (3.2–6.1)                        | 6.8 (6.1–7.6)       | 6.9 (6.4–7.3)       | 43          | 327     | 822     | 53.3%                                        | 1.5%                                         |
| Ovary                                  | 7              | 8    | 5    | 4.1 (3.0–5.5)                        | 4.5 (4.0–5.2)       | 4.7 (4.3–5.1)       | 49          | 256     | 605     | 14.6%                                        | 4.4%                                         |
| Stomach                                | 3              | 5    | 6    | 10.5 (8.5–12.8)                      | 6.6 (5.9–7.4)       | 3.9 (3.5–4.2)       | 109         | 324     | 478     | –62.9%                                       | –40.9%                                       |
| Liver                                  | 13             | 6    | 7    | 1.9 (1.2–2.9)                        | 5.6 (4.9–6.3)       | 3.6 (3.2–4.0)       | 22          | 285     | 426     | 89.5%                                        | –35.7%                                       |
| Corpus and uterus                      | 11             | 11   | 8    | 2.6 (1.7–3.7)                        | 2.3 (1.9–2.8)       | 3.3 (3.0–3.7)       | 28          | 128     | 437     | 26.9%                                        | 43.5%                                        |
| Lymphoma                               | 10             | 7    | 9    | 3.0 (2.0–4.3)                        | 4.6 (4.0–5.3)       | 3.0 (2.7–3.4)       | 32          | 230     | 356     | 0.0%                                         | –34.8%                                       |
| Leukaemia                              | 8              | 9    | 10   | 3.4 (2.3–4.8)                        | 3.2 (2.7–3.7)       | 2.5 (2.2–2.8)       | 40          | 175     | 311     | –26.5%                                       | –21.9%                                       |

Rank is based on the age-adjusted mortality rate. Age-adjusted mortality rates are per 100,000 population and age-adjusted to the 2000 United States standard population. Death count is the number of cancer deaths. CI, confidence interval. Other race and ethnicity includes American Indian/AK Native, Asian/Pacific Islander.

**Table S10** Mortality rate changes from 1975–2016 of the 10 leading causes of cancer death by age group (birth–39 years) in the United States

| All causes                     | Mortality rank |      |      | Age-adjusted mortality rate (95% CI) |               |               | Death count |       |       | Relative change in mortality (2016 vs. 1975) | Relative change in mortality (2016 vs. 2000) |
|--------------------------------|----------------|------|------|--------------------------------------|---------------|---------------|-------------|-------|-------|----------------------------------------------|----------------------------------------------|
|                                | 1975           | 2000 | 2016 | 1975                                 | 2000          | 2016          | 1975        | 2000  | 2016  |                                              |                                              |
| <b>Male (Birth–39 years)</b>   |                |      |      |                                      |               |               |             |       |       |                                              |                                              |
| All malignant cancers          |                |      |      | 12.0 (11.7–12.3)                     | 7.5 (7.3–7.7) | 6.1 (5.9–6.3) | 7,138       | 6,130 | 5,144 | –49.2%                                       | –18.7%                                       |
| Brain and other nervous system | 3              | 2    | 1    | 1.4 (1.3–1.4)                        | 1.1 (1.1–1.2) | 1.0 (0.9–1.1) | 845         | 933   | 852   | –28.6%                                       | –9.1%                                        |
| Leukaemia                      | 1              | 1    | 2    | 2.2 (2.1–2.4)                        | 1.3 (1.2–1.3) | 0.9 (0.9–1.0) | 1,529       | 1,041 | 806   | –59.1%                                       | –30.8%                                       |
| Colon and rectum               | 5              | 5    | 3    | 0.8 (0.7–0.9)                        | 0.5 (0.5–0.6) | 0.6 (0.6–0.7) | 395         | 442   | 494   | –25.0%                                       | 20.0%                                        |
| Lymphoma                       | 2              | 3    | 4    | 1.7 (1.6–1.8)                        | 0.8 (0.8–0.9) | 0.4 (0.3–0.4) | 1,097       | 683   | 337   | –76.5%                                       | –50.0%                                       |
| Soft tissue including heart    | 9              | 6    | 4    | 0.3 (0.3–0.4)                        | 0.4 (0.3–0.4) | 0.4 (0.3–0.4) | 196         | 301   | 319   | 33.3%                                        | 0.0%                                         |
| Lung and bronchus              | 4              | 4    | 6    | 1.3 (1.2–1.4)                        | 0.6 (0.6–0.7) | 0.3 (0.2–0.3) | 576         | 487   | 215   | –76.9%                                       | –50.0%                                       |
| Bones and joints               | 8              | 7    | 6    | 0.4 (0.3–0.4)                        | 0.3 (0.2–0.3) | 0.3 (0.3–0.3) | 263         | 234   | 270   | –25.0%                                       | 0.0%                                         |
| Testis                         | 6              | 9    | 8    | 0.7 (0.7–0.8)                        | 0.2 (0.2–0.3) | 0.2 (0.2–0.2) | 473         | 183   | 188   | –71.4%                                       | 0.0%                                         |
| Melanoma of the skin           | 6              | 7    | 8    | 0.7 (0.6–0.8)                        | 0.3 (0.3–0.3) | 0.2 (0.2–0.2) | 369         | 250   | 162   | –71.4%                                       | –33.3%                                       |
| Pancreas                       | 9              | 9    | 8    | 0.3 (0.2–0.3)                        | 0.2 (0.1–0.2) | 0.2 (0.1–0.2) | 129         | 125   | 127   | –33.3%                                       | 0.0%                                         |
| Kidney and renal pelvis        | 11             | 13   | 8    | 0.2 (0.2–0.3)                        | 0.1 (0.1–0.2) | 0.2 (0.2–0.2) | 132         | 113   | 148   | 0.0%                                         | 100.0%                                       |
| Liver                          | 11             | 9    | 8    | 0.2 (0.2–0.2)                        | 0.2 (0.2–0.2) | 0.2 (0.1–0.2) | 120         | 152   | 143   | 0.0%                                         | 0.0%                                         |
| Stomach                        | 11             | 9    | 8    | 0.2 (0.2–0.3)                        | 0.2 (0.2–0.2) | 0.2 (0.2–0.2) | 119         | 175   | 174   | 0.0%                                         | 0.0%                                         |
| <b>Female (Birth–39 years)</b> |                |      |      |                                      |               |               |             |       |       |                                              |                                              |
| All malignant cancers          |                |      |      | 12.2 (11.9–12.5)                     | 8.2 (8.0–8.4) | 6.8 (6.6–6.9) | 6,864       | 6,590 | 5,473 | –44.3%                                       | –17.1%                                       |
| Breast                         | 1              | 1    | 1    | 2.6 (2.5–2.8)                        | 1.8 (1.7–1.9) | 1.5 (1.4–1.6) | 1,283       | 1,445 | 1,158 | –42.3%                                       | –16.7%                                       |
| Leukaemia                      | 2              | 2    | 2    | 1.7 (1.6–1.8)                        | 0.9 (0.9–1.0) | 0.7 (0.6–0.7) | 1,155       | 754   | 561   | –58.8%                                       | –22.2%                                       |
| Brain and other nervous system | 3              | 3    | 2    | 1.0 (0.9–1.1)                        | 0.7 (0.7–0.8) | 0.7 (0.7–0.8) | 644         | 592   | 609   | –30.0%                                       | 0.0%                                         |
| Cervix uteri                   | 5              | 3    | 4    | 0.9 (0.9–1.0)                        | 0.7 (0.6–0.7) | 0.6 (0.5–0.6) | 487         | 542   | 471   | –33.3%                                       | –14.3%                                       |
| Colon and rectum               | 7              | 7    | 5    | 0.6 (0.5–0.7)                        | 0.4 (0.4–0.5) | 0.5 (0.5–0.6) | 303         | 340   | 420   | –16.7%                                       | 25.0%                                        |
| Ovary                          | 7              | 8    | 6    | 0.6 (0.5–0.7)                        | 0.3 (0.3–0.4) | 0.3 (0.2–0.3) | 333         | 271   | 230   | –50.0%                                       | 0.0%                                         |
| Soft tissue including heart    | 11             | 8    | 6    | 0.2 (0.2–0.3)                        | 0.3 (0.3–0.3) | 0.3 (0.2–0.3) | 158         | 240   | 229   | 50.0%                                        | 0.0%                                         |
| Lymphoma                       | 3              | 5    | 8    | 1.0 (0.9–1.0)                        | 0.5 (0.5–0.6) | 0.2 (0.2–0.2) | 597         | 439   | 162   | –80.0%                                       | –60.0%                                       |
| Lung and bronchus              | 6              | 5    | 8    | 0.7 (0.6–0.7)                        | 0.5 (0.4–0.5) | 0.2 (0.2–0.3) | 303         | 399   | 190   | –71.4%                                       | –60.0%                                       |
| Bones and joints               | 10             | 11   | 8    | 0.3 (0.2–0.3)                        | 0.2 (0.2–0.2) | 0.2 (0.2–0.2) | 200         | 142   | 162   | –33.3%                                       | 0.0%                                         |
| Stomach                        | 11             | 11   | 8    | 0.2 (0.2–0.2)                        | 0.2 (0.1–0.2) | 0.2 (0.2–0.2) | 101         | 131   | 163   | 0.0%                                         | 0.0%                                         |
| Corpus and uterus              | 14             | 13   | 8    | 0.1 (0.1–0.2)                        | 0.1 (0.1–0.1) | 0.2 (0.1–0.2) | 60          | 71    | 121   | 100.0%                                       | 100.0%                                       |

Rank is based on the age-adjusted mortality rate. Age-adjusted mortality rates are per 100,000 population and age-adjusted to the 2000 United States standard population. Death count is the number of cancer deaths. CI, confidence interval.

**Table S11** Mortality rate changes from 1975–2016 of the 10 leading causes of cancer death by age group (40–49 years) in the United States

| All causes                     | Mortality rank |      |      | Age-adjusted mortality rate (95% CI) |                  |                  | Death count |        |        | Relative change in mortality (2016 vs. 1975) | Relative change in mortality (2016 vs. 2000) |
|--------------------------------|----------------|------|------|--------------------------------------|------------------|------------------|-------------|--------|--------|----------------------------------------------|----------------------------------------------|
|                                | 1975           | 2000 | 2016 | 1975                                 | 2000             | 2016             | 1975        | 2000   | 2016   |                                              |                                              |
| <b>Male (40–49 years)</b>      |                |      |      |                                      |                  |                  |             |        |        |                                              |                                              |
| All malignant cancers          |                |      |      | 96.5 (94.7–98.3)                     | 67.0 (65.9–68.1) | 43.6 (42.7–44.5) | 11,113      | 14,185 | 9,070  | –54.8%                                       | –34.9%                                       |
| Colon and rectum               | 2              | 2    | 1    | 8.6 (8.1–9.1)                        | 6.5 (6.1–6.8)    | 7.1 (6.8–7.5)    | 989         | 1,368  | 1,479  | –17.4%                                       | 9.2%                                         |
| Lung and bronchus              | 1              | 1    | 2    | 35.6 (34.5–36.7)                     | 17.5 (16.9–18.1) | 6.6 (6.3–7.0)    | 4,118       | 3,706  | 1,392  | –81.5%                                       | –62.3%                                       |
| Brain and other nervous system | 4              | 3    | 3    | 5.0 (4.6–5.4)                        | 4.2 (3.9–4.5)    | 3.5 (3.3–3.8)    | 570         | 892    | 727    | –30.0%                                       | –16.7%                                       |
| Pancreas                       | 6              | 5    | 4    | 4.3 (3.9–4.6)                        | 3.6 (3.4–3.9)    | 3.1 (2.9–3.3)    | 491         | 768    | 648    | –27.9%                                       | –13.9%                                       |
| Oesophagus                     | 8              | 7    | 5    | 3.1 (2.8–3.4)                        | 2.9 (2.7–3.1)    | 2.2 (2.0–2.4)    | 358         | 611    | 450    | –29.0%                                       | –24.1%                                       |
| Leukaemia                      | 5              | 8    | 6    | 4.4 (4.0–4.8)                        | 2.8 (2.6–3.1)    | 2.0 (1.8–2.2)    | 500         | 598    | 404    | –54.5%                                       | –28.6%                                       |
| Lymphoma                       | 3              | 4    | 7    | 5.4 (5.0–5.9)                        | 4.0 (3.7–4.3)    | 1.9 (1.8–2.1)    | 615         | 842    | 400    | –64.8%                                       | –52.5%                                       |
| Stomach                        | 7              | 11   | 7    | 3.7 (3.3–4.0)                        | 2.2 (2.0–2.5)    | 1.9 (1.7–2.1)    | 421         | 474    | 386    | –48.6%                                       | –13.6%                                       |
| Kidney and renal pelvis        | 9              | 10   | 9    | 2.9 (2.6–3.3)                        | 2.3 (2.1–2.5)    | 1.7 (1.5–1.9)    | 339         | 484    | 355    | –41.4%                                       | –26.1%                                       |
| Melanoma of the skin           | 9              | 9    | 10   | 2.9 (2.6–3.2)                        | 2.6 (2.4–2.9)    | 1.5 (1.3–1.7)    | 330         | 558    | 307    | –48.3%                                       | –42.3%                                       |
| Liver                          | 13             | 6    | 10   | 1.1 (0.9–1.3)                        | 3.5 (3.2–3.7)    | 1.5 (1.4–1.7)    | 126         | 731    | 324    | 36.4%                                        | –57.1%                                       |
| <b>Female (40–49 years)</b>    |                |      |      |                                      |                  |                  |             |        |        |                                              |                                              |
| All malignant cancers          |                |      |      | 106.5 (104.7–108.4)                  | 71.8 (70.7–72.9) | 54.4 (53.4–55.4) | 12,884      | 15,573 | 11,477 | –48.9%                                       | –24.2%                                       |
| Breast                         | 1              | 1    | 1    | 33.1 (32.0–34.1)                     | 21.0 (20.4–21.7) | 15.1 (14.6–15.7) | 3,988       | 4,564  | 3,176  | –54.4%                                       | –28.1%                                       |
| Lung and bronchus              | 2              | 2    | 2    | 15.4 (14.7–16.1)                     | 12.0 (11.5–12.4) | 5.8 (5.5–6.2)    | 1,869       | 2,598  | 1,262  | –62.3%                                       | –51.7%                                       |
| Colon and rectum               | 4              | 3    | 3    | 8.3 (7.8–8.8)                        | 5.2 (4.9–5.5)    | 5.6 (5.3–5.9)    | 997         | 1,128  | 1,178  | –32.5%                                       | 7.7%                                         |
| Cervix uteri                   | 5              | 5    | 4    | 7.7 (7.2–8.2)                        | 3.9 (3.7–4.2)    | 3.4 (3.2–3.7)    | 913         | 848    | 707    | –55.8%                                       | –12.8%                                       |
| Ovary                          | 3              | 4    | 5    | 8.6 (8.1–9.1)                        | 4.3 (4.1–4.6)    | 3.1 (2.9–3.3)    | 1,051       | 944    | 656    | –64.0%                                       | –27.9%                                       |
| Brain and other nervous system | 6              | 6    | 6    | 3.2 (2.9–3.6)                        | 2.6 (2.4–2.8)    | 2.5 (2.3–2.7)    | 387         | 565    | 517    | –21.9%                                       | –3.8%                                        |
| Pancreas                       | 9              | 8    | 7    | 2.4 (2.2–2.7)                        | 2.2 (2.0–2.4)    | 2.2 (2.0–2.4)    | 297         | 474    | 478    | –8.3%                                        | 0.0%                                         |
| Corpus and uterus              | 11             | 12   | 8    | 2.0 (1.7–2.3)                        | 1.3 (1.2–1.5)    | 1.8 (1.7–2.0)    | 242         | 287    | 389    | –10.0%                                       | 38.5%                                        |
| Leukaemia                      | 6              | 9    | 9    | 3.2 (2.9–3.5)                        | 2.1 (1.9–2.3)    | 1.7 (1.5–1.9)    | 380         | 462    | 355    | –46.9%                                       | –19.0%                                       |
| Stomach                        | 10             | 11   | 10   | 2.2 (2.0–2.5)                        | 1.4 (1.3–1.6)    | 1.4 (1.2–1.5)    | 271         | 311    | 285    | –36.4%                                       | 0.0%                                         |

Rank is based on the age-adjusted mortality rate. Age-adjusted mortality rates are per 100,000 population and age-adjusted to the 2000 United States standard population. Death count is the number of cancer deaths. CI, confidence interval.

**Table S12** Mortality rate changes from 1975–2016 of the 10 leading causes of cancer death by age group (50–59 years) in the United States

| All causes                     | Mortality rank |      |      | Age-adjusted mortality rate (95% CI) |                     |                     | Death count |        |        | Relative change in mortality (2016 vs. 1975) | Relative change in mortality (2016 vs. 2000) |
|--------------------------------|----------------|------|------|--------------------------------------|---------------------|---------------------|-------------|--------|--------|----------------------------------------------|----------------------------------------------|
|                                | 1975           | 2000 | 2016 | 1975                                 | 2000                | 2016                | 1975        | 2000   | 2016   |                                              |                                              |
| <b>Male (50–59 years)</b>      |                |      |      |                                      |                     |                     |             |        |        |                                              |                                              |
| All malignant cancers          |                |      |      | 309.3 (306.0–312.6)                  | 236.0 (233.6–238.5) | 180.0 (178.2–181.8) | 33,872      | 35,884 | 40,157 | –41.8%                                       | –23.7%                                       |
| Lung and bronchus              | 1              | 1    | 1    | 123.2 (121.1–125.3)                  | 79.8 (78.4–81.2)    | 45.3 (44.4–46.2)    | 13,485      | 12,121 | 10,196 | –63.2%                                       | –43.2%                                       |
| Colon and rectum               | 2              | 2    | 2    | 30.6 (29.6–31.6)                     | 22.6 (21.8–23.3)    | 20.1 (19.5–20.7)    | 3,354       | 3,433  | 4,409  | –34.3%                                       | –11.1%                                       |
| Pancreas                       | 3              | 4    | 3    | 16.4 (15.6–17.2)                     | 14.2 (13.6–14.8)    | 13.9 (13.4–14.4)    | 1,794       | 2,161  | 3,099  | –15.2%                                       | –2.1%                                        |
| Liver                          | 14             | 7    | 4    | 4.4 (4.0–4.8)                        | 8.7 (8.2–9.1)       | 13.3 (12.8–13.8)    | 485         | 1,318  | 3,012  | 202.3%                                       | 52.9%                                        |
| Oesophagus                     | 6              | 5    | 5    | 11.5 (10.9–12.2)                     | 11.4 (10.9–12.0)    | 9.2 (8.8–9.6)       | 1,262       | 1,734  | 2,049  | –20.0%                                       | –19.3%                                       |
| Brain and other nervous system | 7              | 7    | 6    | 10.1 (9.5–10.7)                      | 8.7 (8.2–9.2)       | 8.3 (8.0–8.7)       | 1,101       | 1,327  | 1,835  | –17.8%                                       | –4.6%                                        |
| Kidney and renal pelvis        | 9              | 9    | 7    | 8.5 (7.9–9.0)                        | 8.5 (8.1–9.0)       | 6.0 (5.7–6.3)       | 924         | 1,298  | 1,328  | –29.4%                                       | –29.4%                                       |
| Prostate                       | 10             | 12   | 8    | 7.6 (7.0–8.1)                        | 5.8 (5.5–6.2)       | 5.7 (5.3–6.0)       | 844         | 886    | 1,293  | –25.0%                                       | –1.7%                                        |
| Lymphoma                       | 5              | 6    | 9    | 11.8 (11.1–12.4)                     | 10.5 (10.0–11.0)    | 5.6 (5.2–5.9)       | 1,285       | 1,594  | 1,223  | –52.5%                                       | –46.7%                                       |
| Stomach                        | 4              | 11   | 10   | 12.4 (11.8–13.1)                     | 6.0 (5.7–6.4)       | 4.9 (4.6–5.2)       | 1,357       | 919    | 1,084  | –60.5%                                       | –18.3%                                       |
| Leukaemia                      | 8              | 10   | 10   | 9.1 (8.6–9.7)                        | 7.0 (6.6–7.5)       | 4.9 (4.6–5.2)       | 1,003       | 1,068  | 1,081  | –46.2%                                       | –30.0%                                       |
| <b>Female (50–59 years)</b>    |                |      |      |                                      |                     |                     |             |        |        |                                              |                                              |
| All malignant cancers          |                |      |      | 251.9 (249.1–254.8)                  | 200.7 (198.5–202.9) | 157.9 (156.3–159.6) | 30,198      | 32,277 | 36,598 | –37.3%                                       | –21.3%                                       |
| Lung and bronchus              | 2              | 1    | 1    | 39.4 (38.3–40.5)                     | 49.8 (48.7–50.9)    | 35.8 (35.1–36.6)    | 4,729       | 8,015  | 8,414  | –9.1%                                        | –28.1%                                       |
| Breast                         | 1              | 2    | 2    | 64.4 (63.0–65.9)                     | 45.8 (44.8–46.9)    | 31.6 (30.9–32.4)    | 7,682       | 7,373  | 7,229  | –50.9%                                       | –31.0%                                       |
| Colon and rectum               | 3              | 3    | 3    | 26.6 (25.7–27.5)                     | 15.5 (14.9–16.1)    | 13.7 (13.2–14.2)    | 3,205       | 2,491  | 3,150  | –48.5%                                       | –11.6%                                       |
| Pancreas                       | 6              | 5    | 4    | 9.8 (9.3–10.4)                       | 8.7 (8.2–9.2)       | 9.6 (9.2–10.0)      | 1,190       | 1,397  | 2,247  | –2.0%                                        | 10.3%                                        |
| Ovary                          | 4              | 4    | 5    | 20.7 (19.9–21.6)                     | 13.0 (12.4–13.6)    | 9.2 (8.8–9.6)       | 2,473       | 2,089  | 2,121  | –55.6%                                       | –29.2%                                       |
| Corpus and uterus              | 8              | 9    | 6    | 7.1 (6.6–7.5)                        | 4.9 (4.6–5.3)       | 6.2 (5.9–6.5)       | 853         | 795    | 1,447  | –12.7%                                       | 26.5%                                        |
| Brain and other nervous system | 9              | 7    | 7    | 6.9 (6.4–7.4)                        | 5.5 (5.2–5.9)       | 5.1 (4.8–5.4)       | 825         | 892    | 1,181  | –26.1%                                       | –7.3%                                        |
| Cervix uteri                   | 5              | 7    | 8    | 10.8 (10.2–11.4)                     | 5.5 (5.1–5.9)       | 4.4 (4.1–4.7)       | 1,278       | 883    | 991    | –59.3%                                       | –20.0%                                       |
| Leukaemia                      | 10             | 10   | 9    | 6.1 (5.7–6.6)                        | 4.8 (4.5–5.2)       | 3.3 (3.1–3.6)       | 735         | 772    | 770    | –45.9%                                       | –31.3%                                       |
| Liver                          | 16             | 15   | 10   | 2.2 (1.9–2.5)                        | 2.0 (1.8–2.3)       | 3.0 (2.8–3.2)       | 262         | 327    | 714    | 36.4%                                        | 50.0%                                        |

Rank is based on the age-adjusted mortality rate. Age-adjusted mortality rates are per 100,000 population and age-adjusted to the 2000 United States standard population. Death count is the number of cancer deaths. CI, confidence interval.

**Table S13** Mortality rate changes from 1975–2016 of the 10 leading causes of cancer death by age group (60–69 years) in the United States

| All causes                     | Mortality rank |      |      | Age-adjusted mortality rate (95% CI) |                     |                     | Death count |        |        | Relative change in mortality (2016 vs. 1975) | Relative change in mortality (2016 vs. 2000) |
|--------------------------------|----------------|------|------|--------------------------------------|---------------------|---------------------|-------------|--------|--------|----------------------------------------------|----------------------------------------------|
|                                | 1975           | 2000 | 2016 | 1975                                 | 2000                | 2016                | 1975        | 2000   | 2016   |                                              |                                              |
| Male (60–69 years)             |                |      |      |                                      |                     |                     |             |        |        |                                              |                                              |
| All malignant cancers          |                |      |      | 763.3 (757.2–769.5)                  | 674.4 (669.2–679.6) | 485.4 (482.1–488.7) | 59,858      | 64,245 | 83,485 | –36.4%                                       | –28.0%                                       |
| Lung and bronchus              | 1              | 1    | 1    | 290.0 (286.2–293.8)                  | 257.9 (254.7–261.2) | 136.2 (134.4–137.9) | 22,773      | 24,566 | 23,414 | –53.0%                                       | –47.2%                                       |
| Colon and rectum               | 2              | 2    | 2    | 86.0 (84.0–88.1)                     | 63.2 (61.6–64.8)    | 42.1 (41.2–43.1)    | 6,729       | 6,021  | 7,250  | –51.0%                                       | –33.4%                                       |
| Pancreas                       | 4              | 4    | 3    | 44.0 (42.5–45.5)                     | 36.8 (35.6–38.0)    | 38.0 (37.1–39.0)    | 3,450       | 3,508  | 6,538  | –13.6%                                       | 3.3%                                         |
| Liver                          | 12             | 9    | 4    | 12.3 (11.5–13.1)                     | 16.6 (15.8–17.5)    | 34.0 (33.1–34.8)    | 964         | 1,586  | 5,861  | 176.4%                                       | 104.8%                                       |
| Prostate                       | 3              | 3    | 5    | 51.6 (50.1–53.3)                     | 39.7 (38.5–41.0)    | 29.0 (28.2–29.8)    | 4,015       | 3,772  | 4,973  | –43.8%                                       | –27.0%                                       |
| Oesophagus                     | 7              | 5    | 6    | 22.3 (21.3–23.4)                     | 26.5 (25.5–27.6)    | 23.6 (22.8–24.3)    | 1,753       | 2,530  | 4,052  | 5.8%                                         | –10.9%                                       |
| Brain and other nervous system | 11             | 11   | 7    | 16.2 (15.3–17.1)                     | 15.8 (15.0–16.6)    | 15.4 (14.9–16.0)    | 1,279       | 1,508  | 2,660  | –4.9%                                        | –2.5%                                        |
| Leukaemia                      | 8              | 7    | 8    | 22.0 (20.9–23.0)                     | 22.2 (21.3–23.2)    | 15.3 (14.7–15.9)    | 1,721       | 2,116  | 2,620  | –30.5%                                       | –31.1%                                       |
| Kidney and renal pelvis        | 10             | 8    | 9    | 16.9 (16.1–17.9)                     | 18.3 (17.4–19.2)    | 15.0 (14.4–15.6)    | 1,332       | 1,745  | 2,576  | –11.2%                                       | –18.0%                                       |
| Lymphoma                       | 6              | 6    | 10   | 23.0 (21.9–24.1)                     | 25.6 (24.6–26.7)    | 14.9 (14.3–15.4)    | 1,806       | 2,441  | 2,554  | –35.2%                                       | –41.8%                                       |
| Female (60–69 years)           |                |      |      |                                      |                     |                     |             |        |        |                                              |                                              |
| All malignant cancers          |                |      |      | 446.0 (441.8–450.3)                  | 476.7 (472.6–480.8) | 348.9 (346.2–351.5) | 42,026      | 51,673 | 66,445 | –21.8%                                       | –26.8%                                       |
| Lung and bronchus              | 3              | 1    | 1    | 62.5 (60.9–64.1)                     | 148.7 (146.4–151.0) | 90.3 (89.0–91.7)    | 5,891       | 16,121 | 17,201 | 44.5%                                        | –39.3%                                       |
| Breast                         | 1              | 2    | 2    | 87.0 (85.1–88.9)                     | 72.3 (70.7–73.9)    | 52.3 (51.3–53.4)    | 8,198       | 7,830  | 9,971  | –39.9%                                       | –27.7%                                       |
| Pancreas                       | 5              | 5    | 3    | 26.0 (25.0–27.0)                     | 25.0 (24.1–26.0)    | 26.5 (25.8–27.3)    | 2,449       | 2,716  | 5,052  | 1.9%                                         | 6.0%                                         |
| Colon and rectum               | 2              | 3    | 4    | 63.1 (61.5–64.7)                     | 40.7 (39.5–41.9)    | 26.0 (25.3–26.7)    | 5,939       | 4,408  | 4,951  | –58.8%                                       | –36.1%                                       |
| Ovary                          | 4              | 4    | 5    | 31.4 (30.3–32.6)                     | 27.6 (26.6–28.6)    | 19.9 (19.3–20.6)    | 2,962       | 2,990  | 3,799  | –36.6%                                       | –27.9%                                       |
| Corpus and uterus              | 6              | 7    | 6    | 17.6 (16.8–18.5)                     | 13.3 (12.6–14.0)    | 18.2 (17.6–18.8)    | 1,658       | 1,444  | 3,460  | 3.4%                                         | 36.8%                                        |
| Brain and other nervous system | 10             | 9    | 7    | 11.3 (10.6–12.0)                     | 10.4 (9.8–11.0)     | 10.5 (10.1–11.0)    | 1,065       | 1,128  | 2,006  | –7.1%                                        | 1.0%                                         |
| Leukaemia                      | 10             | 8    | 8    | 11.3 (10.6–12.0)                     | 12.4 (11.7–13.1)    | 8.6 (8.2–9.0)       | 1,060       | 1,342  | 1,635  | –23.9%                                       | –30.6%                                       |
| Lymphoma                       | 7              | 6    | 9    | 14.8 (14.1–15.6)                     | 17.2 (16.4–18.0)    | 7.9 (7.5–8.3)       | 1,398       | 1,867  | 1,510  | –46.6%                                       | –54.1%                                       |
| Liver                          | 16             | 15   | 10   | 5.1 (4.6–5.5)                        | 5.4 (5.0–5.9)       | 7.6 (7.2–8.0)       | 478         | 589    | 1,454  | 49.0%                                        | 40.7%                                        |

Rank is based on the age-adjusted mortality rate. Age-adjusted mortality rates are per 100,000 population and age-adjusted to the 2000 United States standard population. Death count is the number of cancer deaths. CI, confidence interval.

**Table S14** Mortality rate changes from 1975–2016 of the 10 leading causes of cancer death by age group (≥70 years) in the United States

| All causes                | Mortality rank |      |      | Age-adjusted mortality rate (95% CI) |                           |                           | Death count |         |         | Relative change in mortality (2016 vs. 1975) | Relative change in mortality (2016 vs. 2000) |
|---------------------------|----------------|------|------|--------------------------------------|---------------------------|---------------------------|-------------|---------|---------|----------------------------------------------|----------------------------------------------|
|                           | 1975           | 2000 | 2016 | 1975                                 | 2000                      | 2016                      | 1975        | 2000    | 2016    |                                              |                                              |
| <b>Male (≥70 years)</b>   |                |      |      |                                      |                           |                           |             |         |         |                                              |                                              |
| All malignant cancers     |                |      |      | 1,591.3 (1,580.4–1,602.3)            | 1,719.0 (1,710.6–1,727.4) | 1,305.1 (1,299.0–1,311.2) | 86,605      | 165,628 | 176,712 | –18.0%                                       | –24.1%                                       |
| Lung and bronchus         | 1              | 1    | 1    | 383.2 (378.1–388.4)                  | 496.3 (491.9–500.8)       | 334.0 (330.9–337.1)       | 22,345      | 49,530  | 45,558  | –12.8%                                       | –32.7%                                       |
| Prostate                  | 2              | 2    | 2    | 285.0 (280.2–289.8)                  | 290.3 (286.8–293.9)       | 179.9 (177.6–182.2)       | 14,488      | 26,286  | 24,009  | –36.9%                                       | –38.0%                                       |
| Colon and rectum          | 3              | 3    | 3    | 232.3 (228.0–236.5)                  | 180.7 (178.0–183.5)       | 103.6 (101.9–105.3)       | 12,352      | 17,220  | 14,010  | –55.4%                                       | –42.7%                                       |
| Pancreas                  | 4              | 4    | 4    | 86.1 (83.6–88.7)                     | 78.5 (76.7–80.3)          | 84.4 (82.9–86.0)          | 4,742       | 7,675   | 11,487  | –2.0%                                        | 7.5%                                         |
| Urinary bladder           | 6              | 7    | 5    | 80.6 (78.1–83.2)                     | 65.0 (63.3–66.6)          | 66.8 (65.4–68.2)          | 4,203       | 6,020   | 8,924   | –17.1%                                       | 2.8%                                         |
| Leukaemia                 | 7              | 5    | 6    | 69.5 (67.2–71.9)                     | 73.0 (71.2–74.7)          | 62.8 (61.5–64.2)          | 3,629       | 6,980   | 8,449   | –9.6%                                        | –14.0%                                       |
| Lymphoma                  | 8              | 6    | 7    | 41.3 (39.5–43.1)                     | 72.0 (70.3–73.7)          | 54.7 (53.4–55.9)          | 2,279       | 6,938   | 7,365   | 32.4%                                        | –24.0%                                       |
| Oesophagus                | 9              | 9    | 8    | 31.9 (30.3–33.4)                     | 43.2 (41.9–44.6)          | 41.4 (40.3–42.5)          | 1,789       | 4,301   | 5,672   | 29.8%                                        | –4.2%                                        |
| Liver                     | 12             | 12   | 9    | 22.1 (20.8–23.4)                     | 30.8 (29.7–31.9)          | 37.3 (36.3–38.3)          | 1,222       | 3,056   | 5,118   | 68.8%                                        | 21.1%                                        |
| Kidney and renal pelvis   | 10             | 10   | 10   | 26.2 (24.8–27.6)                     | 37.2 (36.0–38.5)          | 33.8 (32.9–34.8)          | 1,472       | 3,609   | 4,589   | 29.0%                                        | –9.1%                                        |
| <b>Female (≥70 years)</b> |                |      |      |                                      |                           |                           |             |         |         |                                              |                                              |
| All malignant cancers     |                |      |      | 826.1 (820.1–832.2)                  | 1,018.8 (1,013.8–1,023.8) | 854.1 (849.9–858.3)       | 73,537      | 160,895 | 163,470 | 3.4%                                         | –16.2%                                       |
| Lung and bronchus         | 3              | 1    | 1    | 63.8 (62.2–65.5)                     | 245.2 (242.8–247.7)       | 220.3 (218.2–222.5)       | 5,792       | 37,883  | 41,027  | 245.3%                                       | –10.2%                                       |
| Breast                    | 2              | 2    | 2    | 123.1 (120.8–125.4)                  | 130.3 (128.5–132.1)       | 103.3 (101.9–104.8)       | 11,007      | 20,660  | 19,953  | –16.1%                                       | –20.7%                                       |
| Colon and rectum          | 1              | 3    | 3    | 171.4 (168.6–174.1)                  | 127.7 (126.0–129.5)       | 75.4 (74.2–76.7)          | 15,109      | 20,583  | 14,945  | –56.0%                                       | –41.0%                                       |
| Pancreas                  | 4              | 4    | 4    | 54.0 (52.5–55.5)                     | 66.0 (64.7–67.2)          | 68.1 (66.9–69.3)          | 4,824       | 10,428  | 12,993  | 26.1%                                        | 3.2%                                         |
| Ovary                     | 6              | 5    | 5    | 38.7 (37.4–40.0)                     | 49.6 (48.5–50.7)          | 39.6 (38.7–40.5)          | 3,521       | 7,766   | 7,417   | 2.3%                                         | –20.2%                                       |
| Lymphoma                  | 9              | 6    | 6    | 28.8 (27.7–29.9)                     | 48.5 (47.5–49.6)          | 34.8 (34.0–35.7)          | 2,584       | 7,710   | 6,824   | 20.8%                                        | –28.2%                                       |
| Leukaemia                 | 7              | 7    | 7    | 34.5 (33.3–35.7)                     | 39.1 (38.2–40.1)          | 33.7 (32.9–34.5)          | 3,042       | 6,264   | 6,606   | –2.3%                                        | –13.8%                                       |
| Corpus and uterus         | 8              | 8    | 8    | 30.7 (29.6–31.9)                     | 25.3 (24.5–26.1)          | 28.4 (27.6–29.2)          | 2,757       | 3,988   | 5,316   | –7.5%                                        | 12.3%                                        |
| Myeloma                   | 12             | 9    | 9    | 14.5 (13.7–15.3)                     | 23.1 (22.3–23.8)          | 20.2 (19.5–20.8)          | 1,308       | 3,639   | 3,853   | 39.3%                                        | –12.6%                                       |
| Urinary bladder           | 10             | 11   | 10   | 22.5 (21.5–23.5)                     | 18.9 (18.3–19.6)          | 18.3 (17.7–18.9)          | 1,950       | 3,075   | 3,664   | –18.7%                                       | –3.2%                                        |

Rank is based on the age-adjusted mortality rate. Age-adjusted mortality rates are per 100,000 population and age-adjusted to the 2000 United States standard population. Death count is the number of cancer deaths. CI, confidence interval.

**Table S15** One-year relative survival rates for 20 leading cancers [2016] by sex in the United States, 2010–2016

| Incidence rank [2016] | Cancer                         | One-year relative survival rates (95% CI) |                       |                        |                       | NO.       |         |        |        |
|-----------------------|--------------------------------|-------------------------------------------|-----------------------|------------------------|-----------------------|-----------|---------|--------|--------|
|                       |                                | All races                                 | White                 | Black                  | Other                 | All races | White   | Black  | Other  |
| <b>Male</b>           |                                |                                           |                       |                        |                       |           |         |        |        |
|                       | All malignant cancers          | 80.9% (80.8–81.1%)                        | 81.4% (81.2–81.5%)    | 79.2% (78.8–79.6%)     | 76.0% (75.5–76.5%)    | 404,243   | 318,681 | 44,713 | 34,724 |
| 1                     | Prostate                       | 99.3% (99.2–99.4%)                        | 99.4% (99.3–99.5%)    | 98.9% (98.6–99.2%)     | 98.7% (98.2–99.1%)    | 116,247   | 87,951  | 17,745 | 7,776  |
| 2                     | Lung and bronchus              | 43.4% (42.9–43.9%)                        | 43.1% (42.5–43.6%)    | 42.6% (41.1–44.0%)     | 46.4% (44.9–48.0%)    | 44,679    | 34,733  | 5,207  | 4,587  |
| 3                     | Colon and rectum               | 85.0% (84.6–85.4%)                        | 84.9% (84.4–85.4%)    | 82.5% (81.1–83.7%)     | 86.9% (85.8–87.9%)    | 35,887    | 26,882  | 4,064  | 4,581  |
| 4                     | Urinary bladder                | 91.1% (90.6–91.5%)                        | 91.5% (91.0–91.9%)    | 84.2% (81.7–86.4%)     | 88.9% (86.8–90.7%)    | 24,674    | 21,781  | 1,200  | 1,401  |
| 5                     | Melanoma of the skin           | 97.5% (97.1–97.7%)                        | 97.4% (97.1–97.7%)    | 92.1%# (78.0#–97.3%#)  | 91.6% (86.6–94.7%)    | 21,934    | 20,853  | 61     | 243    |
| 6                     | Lymphoma                       | 84.8% (84.3–85.3%)                        | 85.5% (84.9–86.1%)    | 80.8% (78.8–82.5%)     | 80.3% (78.4–82.1%)    | 22,197    | 17,799  | 2,055  | 2,023  |
| 7                     | Kidney and renal pelvis        | 86.9% (86.3–87.4%)                        | 87.0% (86.3–87.6%)    | 86.1% (84.3–87.7%)     | 85.9% (83.8–87.7%)    | 16,941    | 13,350  | 1,973  | 1,447  |
| 8                     | Leukaemia                      | 80.4% (79.6–81.1%)                        | 81.0% (80.2–81.8%)    | 79.2% (76.3–81.7%)     | 70.9% (68.0–73.7%)    | 13,558    | 11,211  | 1,030  | 1,064  |
| 9                     | Pancreas                       | 34.4% (33.5–35.3%)                        | 34.7% (33.6–35.7%)    | 32.8% (30.1–35.6%)     | 33.1% (30.2–36.0%)    | 11,392    | 8,915   | 1,287  | 1,145  |
| 10                    | Liver                          | 50.5% (49.5–51.4%)                        | 51.0% (49.8–52.2%)    | 45.1% (42.7–47.5%)     | 52.7% (50.4–54.9%)    | 11,439    | 7,423   | 1,785  | 2,163  |
| 11                    | Myeloma                        | 82.3% (81.3–83.3%)                        | 82.1% (80.9–83.3%)    | 82.8% (80.2–85.0%)     | 82.1% (78.4–85.2%)    | 6,800     | 4,947   | 1,209  | 581    |
| 12                    | Stomach                        | 57.5% (56.3–58.7%)                        | 56.8% (55.3–58.2%)    | 53.9% (50.4–57.3%)     | 62.4% (59.5–65.2%)    | 7,345     | 5,057   | 938    | 1,302  |
| 13                    | Thyroid                        | 97.5% (97.0–98.0%)                        | 97.8%# (97.2#–98.2%#) | 95.3% (91.6–97.4%)     | 96.3% (94.3–97.5%)    | 6,475     | 5,315   | 320    | 736    |
| 14                    | Brain and other nervous system | 63.0% (61.7–64.2%)                        | 61.7% (60.4–63.0%)    | 70.2% (65.5–74.5%)     | 67.9% (63.4–71.8%)    | 6,817     | 5,766   | 453    | 531    |
| 14                    | Oesophagus                     | 51.0% (49.6–52.3%)                        | 52.3% (50.8–53.7%)    | 41.9% (36.9–46.8%)     | 43.9% (38.7–48.9%)    | 6,119     | 5,221   | 446    | 426    |
| 16                    | Testis                         | 98.2% (97.8–98.5%)                        | 98.4% (97.9–98.7%)    | 94.3% (89.4–96.9%)     | 97.3%# (95.1#–98.5%#) | 5,838     | 5,079   | 190    | 450    |
| 17                    | Tongue                         | 88.2% (87.1–89.2%)                        | 89.1% (88.0–90.1%)    | 74.9% (68.8–79.9%)     | 87.4% (82.4–91.0%)    | 4,698     | 4,097   | 275    | 296    |
| 18                    | Larynx                         | 86.0% (84.7–87.1%)                        | 86.9% (85.5–88.1%)    | 81.3% (77.6–84.5%)     | 84.5% (78.7–88.9%)    | 4,264     | 3,360   | 618    | 248    |
| 19                    | Soft tissue including heart    | 84.9% (83.5–86.2%)                        | 85.5% (83.9–86.9%)    | 81.4% (76.6–85.4%)     | 82.7% (78.0–86.4%)    | 3,285     | 2,511   | 356    | 373    |
| 20                    | Tonsil                         | 92.7% (91.6–93.6%)                        | 93.8% (92.7–94.7%)    | 82.7% (77.4–86.9%)     | 89.1% (82.2–93.4%)    | 3,319     | 2,860   | 288    | 154    |
| <b>Female</b>         |                                |                                           |                       |                        |                       |           |         |        |        |
|                       | All malignant cancers          | 83.3% (83.1–83.4%)                        | 83.5% (83.4–83.7%)    | 79.7% (79.3–80.1%)     | 83.9% (83.5–84.3%)    | 395,331   | 307,195 | 42,621 | 41,572 |
| 1                     | Breast                         | 97.8% (97.7–97.9%)                        | 98.1% (98.0–98.2%)    | 95.7% (95.3–96.1%)     | 98.2% (97.9–98.4%)    | 124,503   | 95,541  | 13,892 | 14,193 |
| 2                     | Lung and bronchus              | 51.9% (51.4–52.5%)                        | 51.1% (50.5–51.7%)    | 52.2% (50.6–53.7%)     | 58.7% (57.0–60.4%)    | 41,772    | 33,182  | 4,766  | 3,705  |
| 3                     | Colon and rectum               | 83.5% (83.0–83.9%)                        | 83.1% (82.5–83.6%)    | 82.5% (81.2–83.7%)     | 86.1% (84.9–87.3%)    | 32,815    | 24,431  | 4,209  | 3,855  |
| 4                     | Corpus and uterus              | 92.9% (92.5–93.2%)                        | 94.0% (93.6–94.4%)    | 83.9% (82.4–85.2%)     | 93.1% (92.1–94.0%)    | 29,573    | 22,801  | 3,160  | 3,353  |
| 5                     | Thyroid                        | 99.1%# (98.9#–99.2%#)                     | 99.3%# (99.1#–99.4%#) | 97.9%# (96.9#–98.6%#)  | 98.5%# (97.9#–99.0%#) | 20,919    | 16,178  | 1,623  | 2,764  |
| 6                     | Melanoma of the skin           | 98.7% (98.4–99.0%)                        | 98.8% (98.5–99.0%)    | 84.4%# (73.5%#–91.1%#) | 93.5% (88.7–96.3%)    | 17,595    | 16,597  | 84     | 233    |
| 7                     | Lymphoma                       | 86.0% (85.4–86.5%)                        | 86.4% (85.8–87.0%)    | 85.8% (83.9–87.5%)     | 80.8% (78.7–82.8%)    | 17,620    | 14,033  | 1,693  | 1,664  |
| 8                     | Pancreas                       | 34.0% (33.1%–34.9%)                       | 33.9% (32.8–35.0%)    | 33.4% (30.8–35.9%)     | 34.9% (32.1–37.8%)    | 11,169    | 8,404   | 1,511  | 1,226  |
| 9                     | Leukaemia                      | 77.5% (76.6–78.4%)                        | 78.1% (77.1–79.1%)    | 75.7% (72.6–78.5%)     | 70.7% (67.2–74.0%)    | 9,712     | 7,852   | 914    | 788    |
| 9                     | Kidney and renal pelvis        | 86.9% (86.1–87.6%)                        | 86.6% (85.7–87.4%)    | 87.9% (85.7–89.8%)     | 87.0% (84.4–89.2%)    | 9,596     | 7,374   | 1,245  | 861    |
| 11                    | Ovary                          | 78.7% (77.9–79.4%)                        | 78.6% (77.7–79.4%)    | 72.9% (70.0–75.6%)     | 84.0% (81.8–86.0%)    | 11,881    | 9,462   | 1,088  | 1,258  |
| 12                    | Urinary bladder                | 84.3% (83.4–85.2%)                        | 85.3% (84.3–86.3%)    | 72.4% (68.4–76.1%)     | 82.4% (78.3–85.8%)    | 7,730     | 6,504   | 623    | 494    |
| 13                    | Cervix uteri                   | 86.9% (86.0–87.8%)                        | 88.2% (87.2–89.2%)    | 79.5% (76.5–82.2%)     | 86.2% (83.6–88.5%)    | 6,576     | 4,706   | 909    | 870    |
| 14                    | Myeloma                        | 81.0% (79.8–82.1%)                        | 80.1% (78.6–81.5%)    | 83.1% (80.7–85.3%)     | 81.0% (76.9–84.5%)    | 5,511     | 3,697   | 1,269  | 502    |
| 15                    | Stomach                        | 58.9% (57.4–60.4%)                        | 58.7% (56.7–60.6%)    | 61.0% (57.1–64.6%)     | 57.4% (54.1–60.6%)    | 4,699     | 2,892   | 756    | 1,006  |
| 15                    | Brain and other nervous system | 62.1% (60.7–63.5%)                        | 60.6% (59.1–62.1%)    | 69.8% (64.7–74.2%)     | 67.3% (62.2–71.9%)    | 5,252     | 4,399   | 398    | 398    |
| 17                    | Liver                          | 51.8% (50.0–53.5%)                        | 50.1% (47.9–52.4%)    | 48.5% (44.1–52.9%)     | 57.7% (54.1–61.1%)    | 3,542     | 2,117   | 559    | 842    |
| 18                    | Soft tissue including heart    | 84.7% (83.0–86.1%)                        | 85.3% (83.4–87.0%)    | 84.6% (80.0–88.2%)     | 79.7% (74.2–84.1%)    | 2,522     | 1,839   | 358    | 294    |
| 19                    | Vulva                          | 86.8% (85.1–88.4%)                        | 86.3% (84.3–88.0%)    | 87.7% (80.6–92.4%)     | 91.3%# (82.9#–95.7%#) | 2,088     | 1,791   | 163    | 113    |
| 20                    | Tongue                         | 85.5% (83.6–87.3%)                        | 85.7% (83.4–87.6%)    | 74.9% (64.5–82.6%)     | 88.8% (83.2–92.6%)    | 1,714     | 1,363   | 106    | 225    |
| 20                    | Small intestine                | 83.3% (81.4–85.0%)                        | 84.0% (81.8–86.0%)    | 82.7% (77.9–86.6%)     | 75.8% (67.4–82.3%)    | 1,956     | 1,432   | 357    | 146    |

#, the relative cumulative survival increased from a prior interval and has been adjusted. Other denotes other races and ethnicities, including American Indian/AK Native, Asian/Pacific Islander. Rank is based on age-adjusted cancer incidence rate in 2016. CI, confidence interval.

**Table S16** Three-year relative survival rates for 20 leading cancers [2016] by sex in the United States, 2010–2016

| Incidence rank [2016] | Cancer                         | Three-year relative survival rates (95% CI) |                       |                       |                       | NO.       |         |        |        |
|-----------------------|--------------------------------|---------------------------------------------|-----------------------|-----------------------|-----------------------|-----------|---------|--------|--------|
|                       |                                | All races                                   | White                 | Black                 | Other                 | All races | White   | Black  | Other  |
| <b>Male</b>           |                                |                                             |                       |                       |                       |           |         |        |        |
|                       | All malignant cancers          | 71.7% (71.6–71.9%)                          | 72.5% (72.3–72.7%)    | 69.2% (68.7–69.7%)    | 63.5% (62.9–64.1%)    | 404,243   | 318,681 | 44,713 | 34,724 |
| 1                     | Prostate                       | 98.6% (98.4–98.8%)                          | 98.9% (98.6–99.1%)    | 97.3%# (96.6#–97.8%#) | 95.9% (95.1–96.7%)    | 116,247   | 87,951  | 17,745 | 7,776  |
| 2                     | Lung and bronchus              | 23.1% (22.6–23.6%)                          | 23.0% (22.4–23.5%)    | 21.7% (20.3–23.0%)    | 24.9% (23.4–26.4%)    | 44,679    | 34,733  | 5,207  | 4,587  |
| 3                     | Colon and rectum               | 72.3% (71.7–72.9%)                          | 72.9% (72.2–73.6%)    | 65.4% (63.5–67.3%)    | 73.0% (71.3–74.5%)    | 35,887    | 26,882  | 4,064  | 4,581  |
| 4                     | Urinary bladder                | 83.4% (82.7–84.1%)                          | 84.0% (83.2–84.7%)    | 73.6% (70.0–76.8%)    | 79.1% (76.0–81.9%)    | 24,674    | 21,781  | 1,200  | 1,401  |
| 5                     | Melanoma of the skin           | 94.4% (93.8–94.9%)                          | 94.3% (93.7–94.8%)    | 68.2%# (50.3#–80.8%#) | 76.3% (68.6–82.3%)    | 21,934    | 20,853  | 61     | 243    |
| 6                     | Lymphoma                       | 78.7% (78.0–79.4%)                          | 79.5% (78.7–80.2%)    | 74.2% (71.9–76.4%)    | 73.6% (71.3–75.8%)    | 22,197    | 17,799  | 2,055  | 2,023  |
| 7                     | Kidney and renal pelvis        | 79.4% (78.6–80.2%)                          | 79.5% (78.6–80.4%)    | 79.5%# (77.1#–81.6%#) | 75.8% (73.0–78.4%)    | 16,941    | 13,350  | 1,973  | 1,447  |
| 8                     | Leukaemia                      | 71.5% (70.6–72.5%)                          | 72.5% (71.4–73.5%)    | 67.0% (63.3–70.4%)    | 60.1% (56.7–63.4%)    | 13,558    | 11,211  | 1,030  | 1,064  |
| 9                     | Pancreas                       | 14.2% (13.5–15.0%)                          | 14.3% (13.4–15.2%)    | 13.1% (10.9–15.5%)    | 14.0% (11.6–16.5%)    | 11,392    | 8,915   | 1,287  | 1,145  |
| 10                    | Liver                          | 29.3% (28.3–30.3%)                          | 28.8% (27.5–30.0%)    | 25.0% (22.5–27.6%)    | 34.0% (31.6–36.3%)    | 11,439    | 7,423   | 1,785  | 2,163  |
| 11                    | Myeloma                        | 66.6% (65.1–68.0%)                          | 66.4% (64.6–68.1%)    | 66.7% (63.0–70.0%)    | 65.6% (60.5–70.2%)    | 6,800     | 4,947   | 1,209  | 581    |
| 12                    | Stomach                        | 35.8% (34.4–37.1%)                          | 34.9% (33.4–36.5%)    | 33.0% (29.4–36.7%)    | 39.6% (36.4–42.8%)    | 7,345     | 5,057   | 938    | 1,302  |
| 13                    | Thyroid                        | 96.8%# (96.0#–97.4%#)                       | 97.0%# (96.1#–97.7%#) | 94.7%# (90.1#–97.2%#) | 94.8%# (92.3#–96.6%#) | 6,475     | 5,315   | 320    | 736    |
| 14                    | Brain and other nervous system | 37.6% (36.3–39.0%)                          | 36.3% (34.8–37.7%)    | 45.2% (39.9–50.4%)    | 41.2% (36.1–46.1%)    | 6,817     | 5,766   | 453    | 531    |
| 14                    | Oesophagus                     | 26.8% (25.4–28.2%)                          | 28.3% (26.8–29.8%)    | 14.4% (10.7–18.7%)    | 19.4% (14.8–24.4%)    | 6,119     | 5,221   | 446    | 426    |
| 16                    | Testis                         | 97.2% (96.6–97.7%)                          | 97.4% (96.8–97.9%)    | 92.0%# (86.0#–95.6%#) | 96.0%# (93.4#–97.6%#) | 5,838     | 5,079   | 190    | 450    |
| 17                    | Tongue                         | 74.0% (72.4–75.6%)                          | 75.3% (73.5–76.9%)    | 59.3% (52.2–65.7%)    | 69.3% (61.9–75.5%)    | 4,698     | 4,097   | 275    | 296    |
| 18                    | Larynx                         | 71.0% (69.2–72.7%)                          | 72.5% (70.5–74.3%)    | 62.2% (57.1–66.8%)    | 70.0% (62.3–76.4%)    | 4,264     | 3,360   | 618    | 248    |
| 19                    | Soft tissue including heart    | 71.7% (69.7–73.6%)                          | 72.9% (70.6–75.0%)    | 66.3% (59.9–71.9%)    | 65.6%# (59.3#–71.2%#) | 3,285     | 2,511   | 356    | 373    |
| 20                    | Tonsil                         | 83.3% (81.6–84.8%)                          | 85.0% (83.2–86.6%)    | 66.6%# (59.5#–72.8%#) | 79.6%# (70.6#–86.1%#) | 3,319     | 2,860   | 288    | 154    |
| <b>Female</b>         |                                |                                             |                       |                       |                       |           |         |        |        |
|                       | All malignant cancers          | 74.2% (74.1–74.4%)                          | 75.0% (74.8–75.2%)    | 67.3% (66.7–67.8%)    | 73.9% (73.4–74.4%)    | 395,331   | 307,195 | 42,621 | 41,572 |
| 1                     | Breast                         | 94.2% (94.0–94.4%)                          | 95.0% (94.7–95.2%)    | 88.5% (87.7–89.2%)    | 94.4% (93.9–94.9%)    | 124,503   | 95,541  | 13,892 | 14,193 |
| 2                     | Lung and bronchus              | 31.2% (30.7–31.8%)                          | 30.9% (30.3–31.5%)    | 29.6% (28.1–31.2%)    | 35.2% (33.4–37.1%)    | 41,772    | 33,182  | 4,766  | 3,705  |
| 3                     | Colon and rectum               | 72.0% (71.3–72.6%)                          | 72.3% (71.5–73.0%)    | 67.6% (65.8–69.4%)    | 73.2% (71.4–74.9%)    | 32,815    | 24,431  | 4,209  | 3,855  |
| 4                     | Corpus and uterus              | 85.8% (85.2–86.3%)                          | 87.9% (87.3–88.4%)    | 69.2% (67.2–71.2%)    | 86.1% (84.6–87.4%)    | 29,573    | 22,801  | 3,160  | 3,353  |
| 5                     | Thyroid                        | 99.0%# (98.8#–99.2%#)                       | 99.2%# (99.0#–99.4%#) | 97.6%# (96.2#–98.5%#) | 98.0% (97.2–98.6%)    | 20,919    | 16,178  | 1,623  | 2,764  |
| 6                     | Melanoma of the skin           | 97.2% (96.7–97.7%)                          | 97.2% (96.7–97.7%)    | 80.9% (66.3–89.7%)    | 86.6%# (79.3#–91.4%#) | 17,595    | 16,597  | 84     | 233    |
| 7                     | Lymphoma                       | 80.7% (80.0–81.5%)                          | 81.4% (80.5–82.2%)    | 80.5% (78.1–82.7%)    | 73.2% (70.6–75.6%)    | 17,620    | 14,033  | 1,693  | 1,664  |
| 8                     | Pancreas                       | 13.6% (12.8–14.4%)                          | 13.2% (12.3–14.1%)    | 14.6% (12.5–16.8%)    | 14.9% (12.6–17.4%)    | 11,169    | 8,404   | 1,511  | 1,226  |
| 9                     | Leukaemia                      | 68.0% (66.9–69.1%)                          | 69.1% (67.9–70.4%)    | 63.0% (59.1–66.6%)    | 56.6%# (52.4#–60.5%#) | 9,712     | 7,852   | 914    | 788    |
| 9                     | Kidney and renal pelvis        | 80.5% (79.5–81.5%)                          | 80.1% (78.9–81.3%)    | 82.8% (79.9–85.3%)    | 78.2%# (74.7#–81.4%#) | 9,596     | 7,374   | 1,245  | 861    |
| 11                    | Ovary                          | 60.4% (59.3–61.5%)                          | 59.9% (58.7–61.1%)    | 55.2% (51.6–58.7%)    | 67.4% (64.2–70.3%)    | 11,881    | 9,462   | 1,088  | 1,258  |
| 12                    | Urinary bladder                | 77.4% (76.1–78.6%)                          | 78.9% (77.6–80.3%)    | 60.4% (55.4–65.0%)    | 72.6%# (67.4#–77.2%#) | 7,730     | 6,504   | 623    | 494    |
| 13                    | Cervix uteri                   | 74.3% (73.0–75.5%)                          | 75.9% (74.4–77.4%)    | 63.7% (59.8–67.3%)    | 74.1%# (70.5#–77.3%#) | 6,576     | 4,706   | 909    | 870    |
| 14                    | Myeloma                        | 66.7% (65.1–68.3%)                          | 66.3% (64.3–68.2%)    | 67.9% (64.5–71.1%)    | 64.0% (58.5–69.0%)    | 5,511     | 3,697   | 1,269  | 502    |
| 15                    | Stomach                        | 39.2% (37.5–40.9%)                          | 39.0% (36.9–41.1%)    | 44.0% (39.7–48.3%)    | 35.4% (31.8–38.9%)    | 4,699     | 2,892   | 756    | 1,006  |
| 15                    | Brain and other nervous system | 40.5% (39.0–42.1%)                          | 38.9% (37.3–40.6%)    | 46.2% (40.3–51.8%)    | 47.7%# (42.0#–53.2%#) | 5,252     | 4,399   | 398    | 398    |
| 17                    | Liver                          | 31.1% (29.3–33.0%)                          | 29.9% (27.5–32.2%)    | 26.9% (22.5–31.4%)    | 37.0% (33.0–40.9%)    | 3,542     | 2,117   | 559    | 842    |
| 18                    | Soft tissue including heart    | 74.1% (71.9–76.1%)                          | 74.2% (71.6–76.6%)    | 75.7%# (69.9#–80.5%#) | 69.2%# (62.4#–75.0%#) | 2,522     | 1,839   | 358    | 294    |
| 19                    | Vulva                          | 76.9% (74.4–79.2%)                          | 76.5%# (73.8#–79.0%#) | 77.2% (67.6–84.3%)    | 76.9%# (65.4#–85.1%#) | 2,088     | 1,791   | 163    | 113    |
| 20                    | Tongue                         | 72.2% (69.4–74.8%)                          | 72.7% (69.6–75.6%)    | 54.4%# (42.2#–65.0%#) | 75.3%# (66.8#–81.9%#) | 1,714     | 1,363   | 106    | 225    |
| 20                    | Small intestine                | 74.4% (71.9–76.7%)                          | 75.9% (73.0–78.6%)    | 73.6%# (67.4#–78.8%#) | 59.3% (48.9–68.2%)    | 1,956     | 1,432   | 357    | 146    |

#, the relative cumulative survival increased from a prior interval and has been adjusted. Other denotes other races and ethnicities, including American Indian/AK Native, Asian/Pacific Islander. Rank is based on age-adjusted cancer incidence rate in 2016. CI, confidence interval.



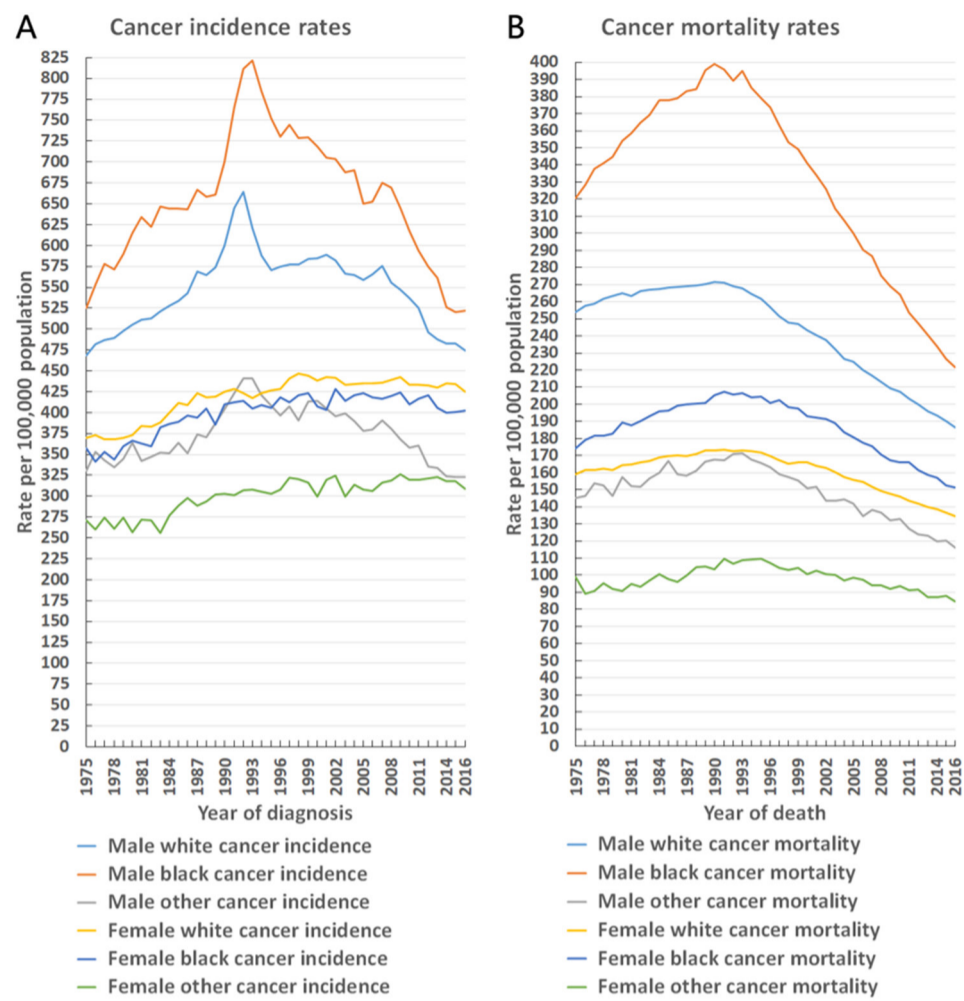

**Figure S1** Trends in overall cancer incidence and mortality rates [1975–2016] by race and ethnicity, United States. Rates are age-adjusted to the 2000 United States standard population. Other denotes other races and ethnicities, including American Indian/AK Native, Asian/Pacific Islander. (A) Overall cancer incidence rates; (B) overall cancer mortality rates.

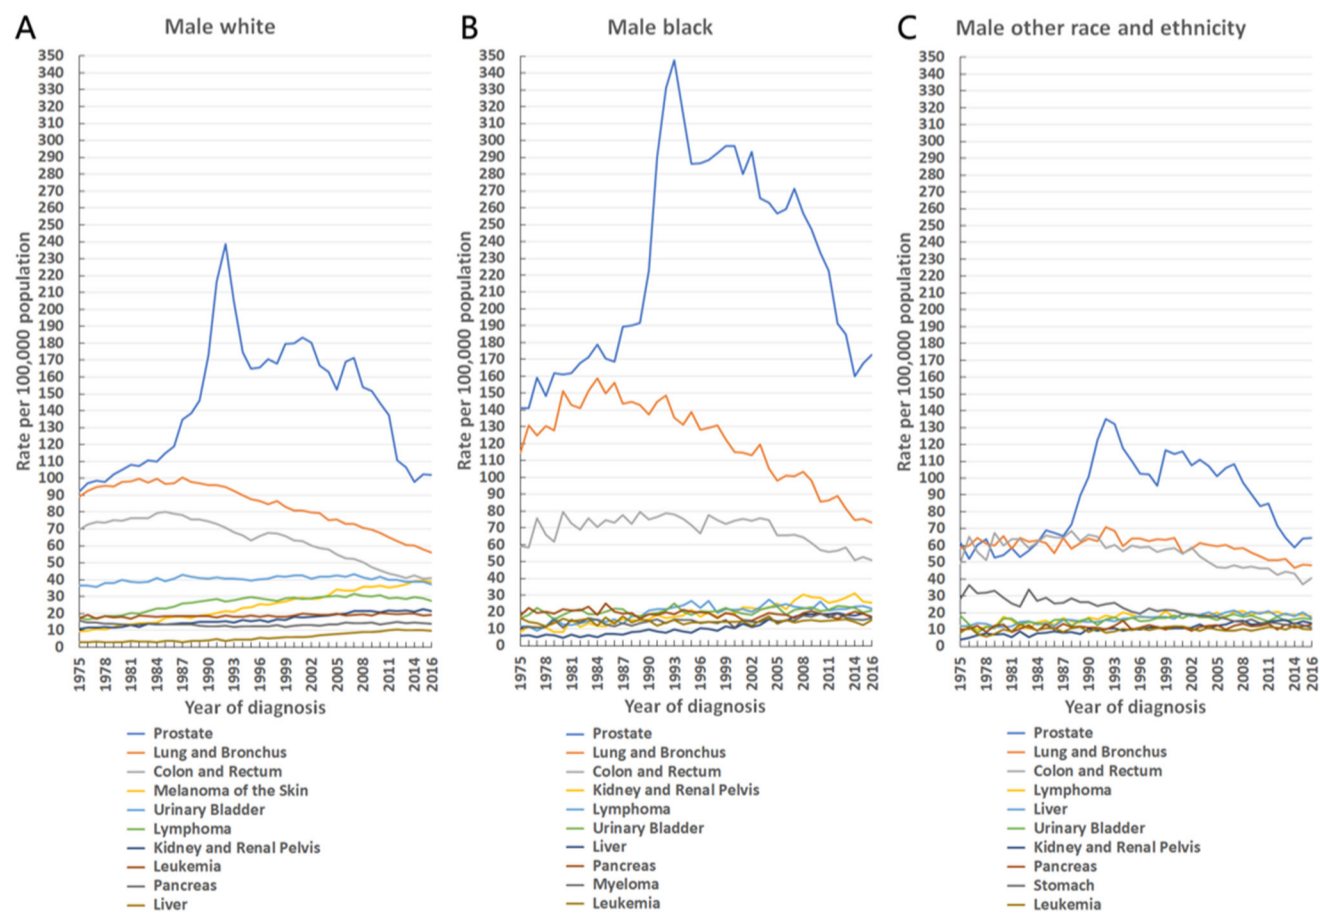

**Figure S2** Trends in the incidence rate of the 10 leading cancers in males by race and ethnicity, United States, 1975–2016. Rates are age-adjusted to the 2000 United States standard population. (A) Male white; (B) male black; (C) male other races and ethnicities.

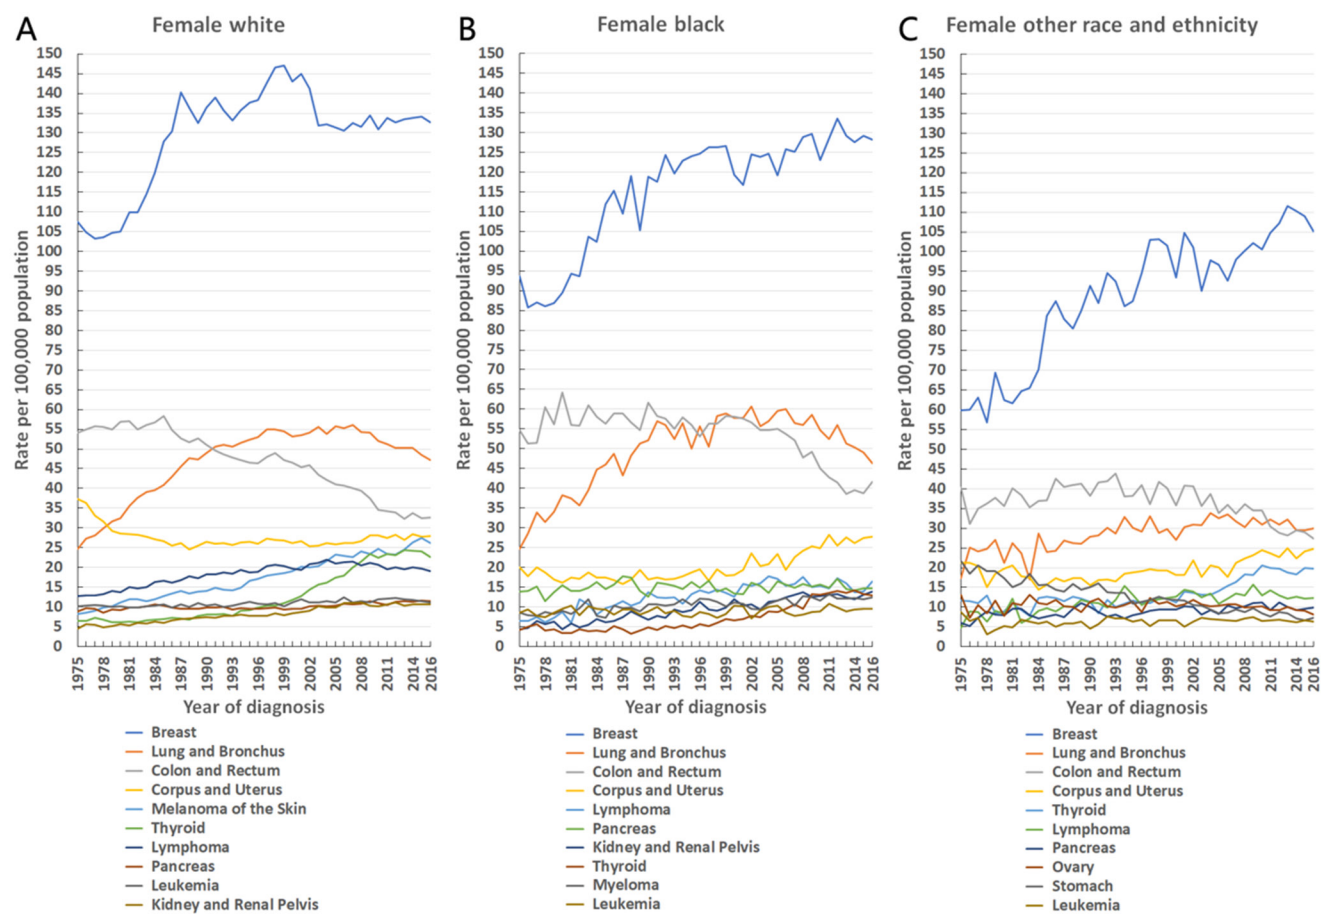

**Figure S3** Trends in the incidence rate of the 10 leading cancers in females by race and ethnicity, United States, 1975–2016. Rates are age-adjusted to the 2000 United States standard population. (A) Female white; (B) female black; (C) female other races and ethnicities.

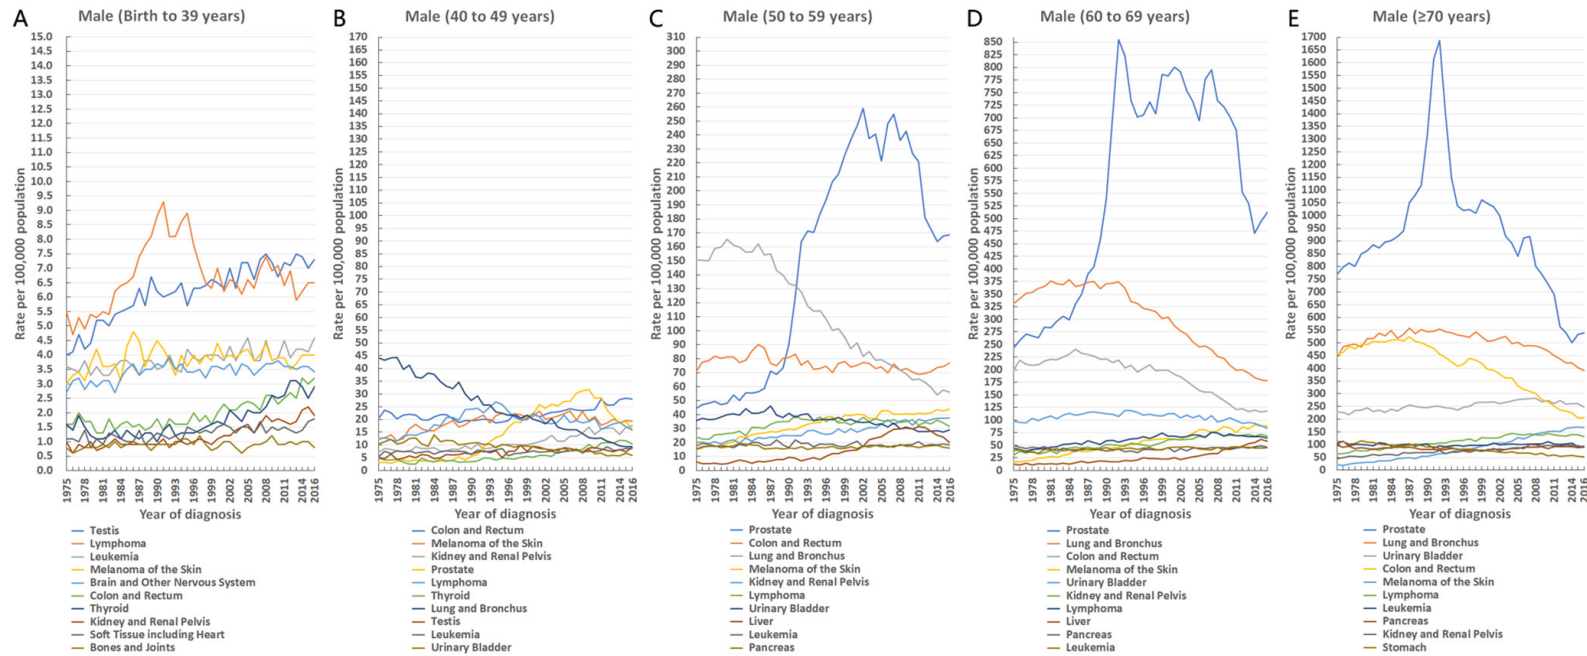

**Figure S4** Trends in the incidence rate of the 10 leading cancers in males by age groups, United States, 1975–2016. Rates are age-adjusted to the 2000 United States standard population. (A) Birth–39 years; (B) 40–49 years; (C) 50–59 years; (D) 60–69 years; (E)  $\geq 70$  years.

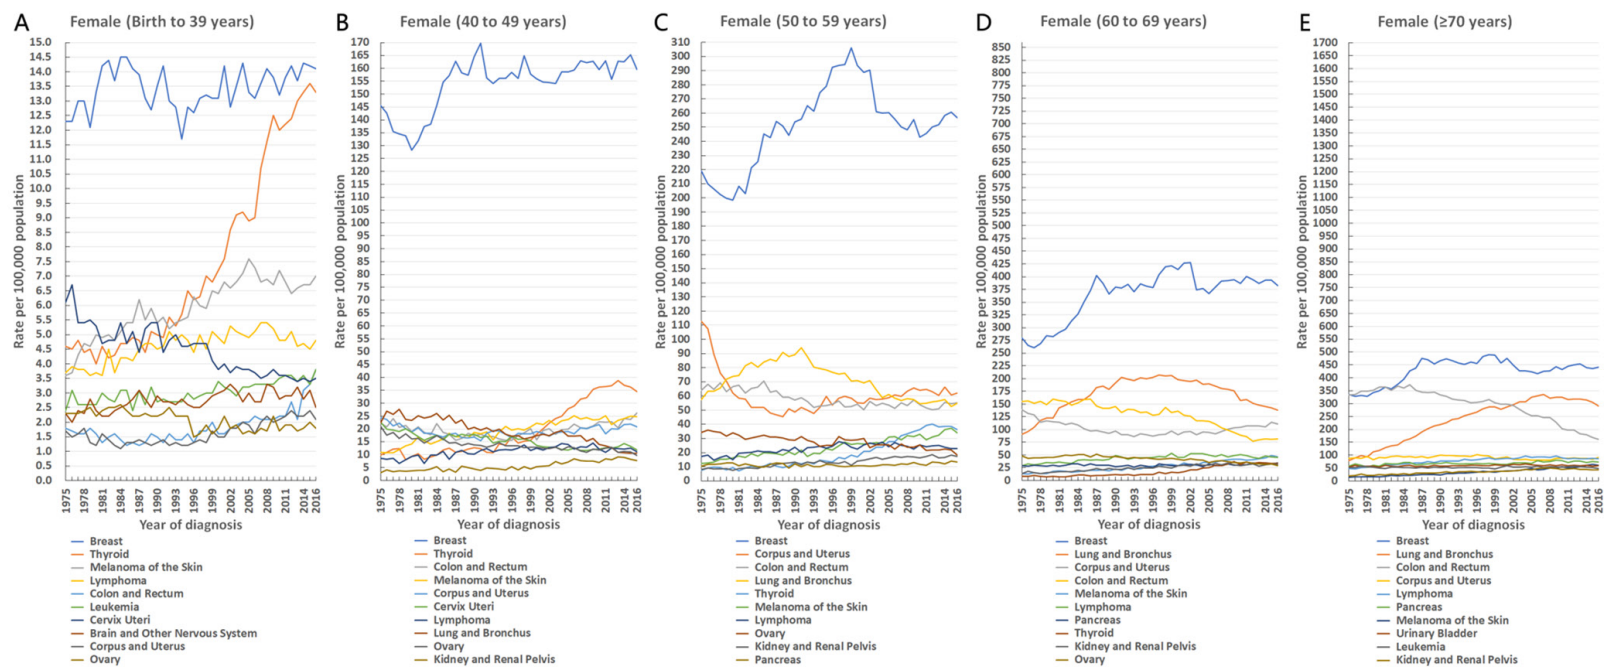

**Figure S5** Trends in the incidence rate of the 10 leading cancers in females by age intervals, United States, 1975–2016. Rates are age-adjusted to the 2000 United States standard population. (A) Birth–39 years; (B) 40–49 years; (C) 50–59 years; (D) 60–69 years; (E) ≥70 years.

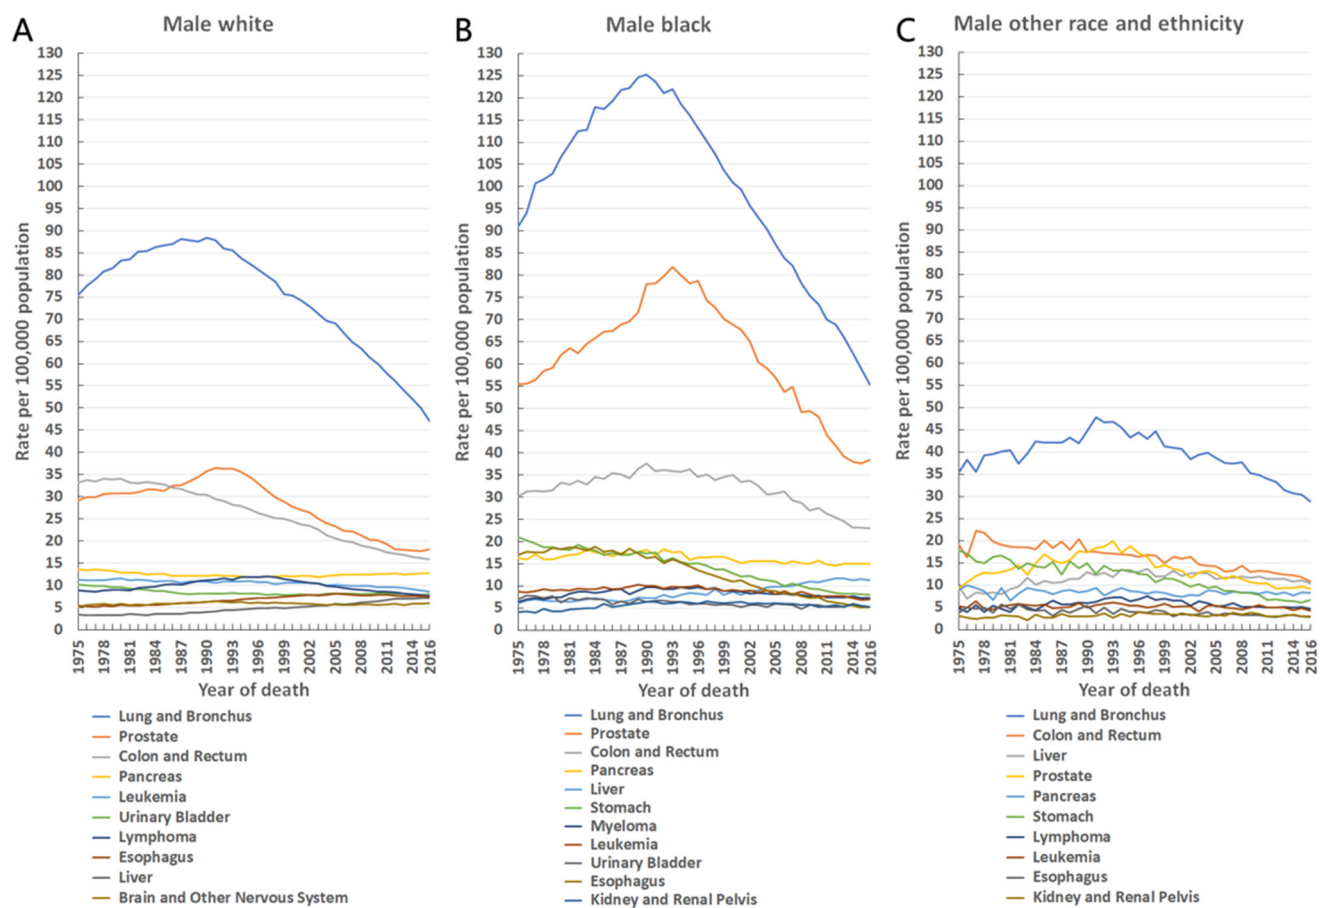

**Figure S6** Trends in the mortality rate of the 10 leading causes of cancer death in males by race and ethnicity, United States, 1975–2016. Rates are age-adjusted to the 2000 United States standard population. (A) Male white; (B) male black; (C) male other races and ethnicities.

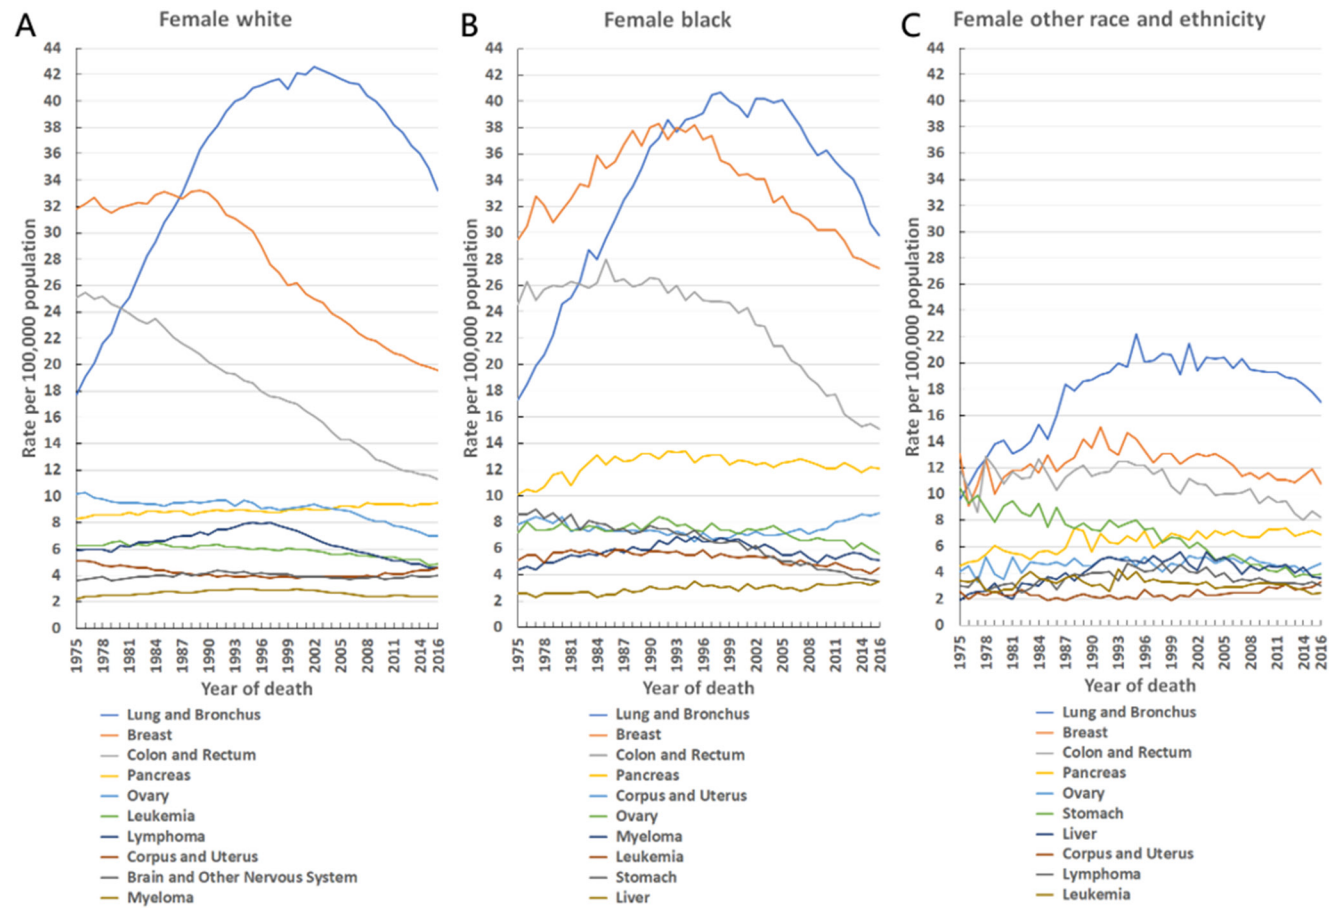

**Figure S7** Trends in the mortality rate of the 10 leading causes of cancer death in females by race and ethnicity, United States, 1975–2016. Rates are age-adjusted to the 2000 United States standard population. (A) Female white; (B) female black; (C) female other races and ethnicities.

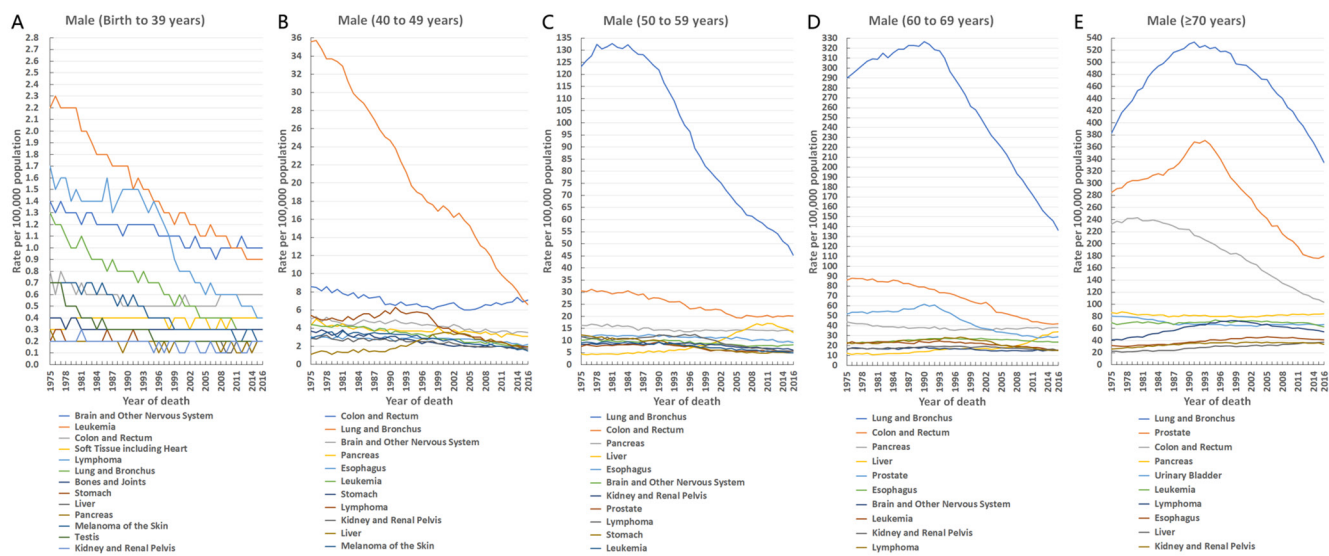

**Figure S8** Trends in the mortality rate of the 10 leading causes of cancer death in males by age groups, United States, 1975–2016. Rates are age-adjusted to the 2000 United States standard population. (A) Birth–39 years; (B) 40–49 years; (C) 50–59 years; (D) 60–69 years; (E)  $\geq 70$  years.

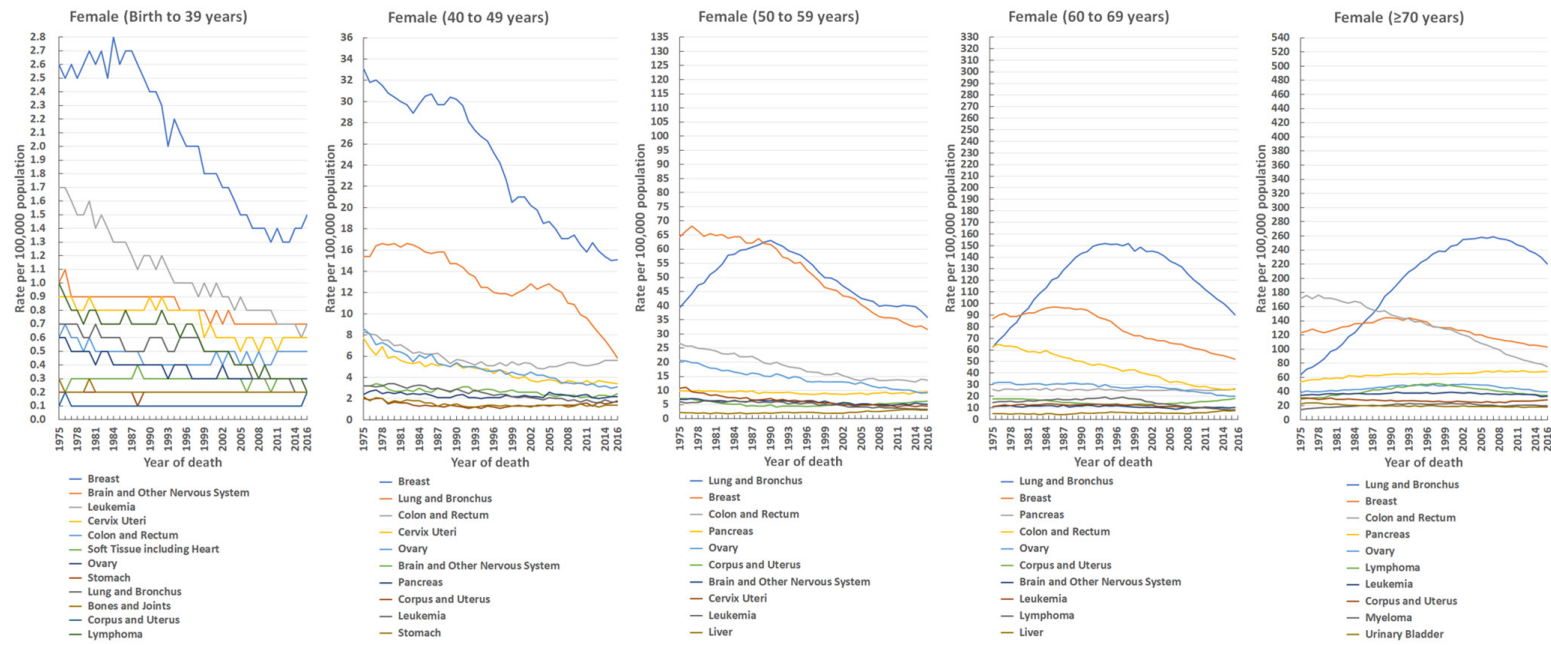

**Figure S9** Trends in the mortality rate of the 10 leading causes of cancer death in females by age groups, United States, 1975–2016. Rates are age-adjusted to the 2000 United States standard population. (A) Birth–39 years; (B) 40–49 years; (C) 50–59 years; (D) 60–69 years; (E) ≥70 years.
